# Supplementary material for: Use of the ONCO-TreC electronic diary compared with a standard paper diary to improve adherence to oral cancer therapy in patients with solid and haematological tumours: protocol for a randomised controlled trial
Source: PubMed Central journal article supplement — BMJ Open. 2022 Jan 11;12(1):e055814. doi: 10.1136/bmjopen-2021-055814 (PMC8753414; doi:10.1136/bmjopen-2021-055814), 2022-01-11
Supplement: bmjopen-2021-055814.draft_revisions.pdf [file bmjopen-2021-055814.draft_revisions.pdf]

# BMJ Open

BMJ Open is committed to open peer review. As part of this commitment we make the peer review history of every article we publish publicly available.

When an article is published we post the peer reviewers' comments and the authors' responses online. We also post the versions of the paper that were used during peer review. These are the versions that the peer review comments apply to.

The versions of the paper that follow are the versions that were submitted during the peer review process. They are not the versions of record or the final published versions. They should not be cited or distributed as the published version of this manuscript.

BMJ Open is an open access journal and the full, final, typeset and author-corrected version of record of the manuscript is available on our site with no access controls, subscription charges or pay-per-view fees (<http://bmjopen.bmj.com>).

If you have any questions on BMJ Open's open peer review process please email [info.bmjopen@bmj.com](mailto:info.bmjopen@bmj.com)

# BMJ Open

## Advancing strategies to increase adherence to oral therapies in onco-hematology: protocol for a randomized controlled study

|                               |                                                                                                                                                                                                                                                                                                                                                                                                                                                                                                                                                                                                                                                                                                                                                                                                                                                                                                                                                                                                                                                                                                                                                                                                                                                                                                                                                                                                                                                                                                                                                                                                                                                                                                                                                                                                                                                                                                                |
|-------------------------------|----------------------------------------------------------------------------------------------------------------------------------------------------------------------------------------------------------------------------------------------------------------------------------------------------------------------------------------------------------------------------------------------------------------------------------------------------------------------------------------------------------------------------------------------------------------------------------------------------------------------------------------------------------------------------------------------------------------------------------------------------------------------------------------------------------------------------------------------------------------------------------------------------------------------------------------------------------------------------------------------------------------------------------------------------------------------------------------------------------------------------------------------------------------------------------------------------------------------------------------------------------------------------------------------------------------------------------------------------------------------------------------------------------------------------------------------------------------------------------------------------------------------------------------------------------------------------------------------------------------------------------------------------------------------------------------------------------------------------------------------------------------------------------------------------------------------------------------------------------------------------------------------------------------|
| Journal:                      | <i>BMJ Open</i>                                                                                                                                                                                                                                                                                                                                                                                                                                                                                                                                                                                                                                                                                                                                                                                                                                                                                                                                                                                                                                                                                                                                                                                                                                                                                                                                                                                                                                                                                                                                                                                                                                                                                                                                                                                                                                                                                                |
| Manuscript ID                 | bmjopen-2021-055814                                                                                                                                                                                                                                                                                                                                                                                                                                                                                                                                                                                                                                                                                                                                                                                                                                                                                                                                                                                                                                                                                                                                                                                                                                                                                                                                                                                                                                                                                                                                                                                                                                                                                                                                                                                                                                                                                            |
| Article Type:                 | Protocol                                                                                                                                                                                                                                                                                                                                                                                                                                                                                                                                                                                                                                                                                                                                                                                                                                                                                                                                                                                                                                                                                                                                                                                                                                                                                                                                                                                                                                                                                                                                                                                                                                                                                                                                                                                                                                                                                                       |
| Date Submitted by the Author: | 02-Aug-2021                                                                                                                                                                                                                                                                                                                                                                                                                                                                                                                                                                                                                                                                                                                                                                                                                                                                                                                                                                                                                                                                                                                                                                                                                                                                                                                                                                                                                                                                                                                                                                                                                                                                                                                                                                                                                                                                                                    |
| Complete List of Authors:     | <p>Passardi, Alessandro; IRCCS Istituto Romagnolo per lo Studio dei Tumori Dino Amadori, Department of Medical Oncology</p> <p>Serra, Patrizia; IRCCS Istituto Romagnolo per lo Studio dei Tumori Dino Amadori, Unit of Biostatistic and Clinical Trials</p> <p>Caffo, Orazio; Provincia autonoma di Trento Azienda Provinciale per i Servizi Sanitari, Department of Medical Oncology</p> <p>Masini, Carla; IRCCS Istituto Romagnolo per lo Studio dei Tumori Dino Amadori, Oncology Pharmacy Unit</p> <p>Brugugnoli, Erika; IRCCS Istituto Romagnolo per lo Studio dei Tumori Dino Amadori, Oncology Pharmacy Unit</p> <p>Vespignani, Roberto; IRCCS Istituto Romagnolo per lo Studio dei Tumori Dino Amadori, IT Service</p> <p>Giardino, Valeria; IRCCS Istituto Romagnolo per lo Studio dei Tumori Dino Amadori, Unit of Biostatistics and Clinical Trials</p> <p>Petracci, Elisabetta ; IRCCS Istituto Romagnolo per lo Studio dei Tumori Dino Amadori, Unit of Biostatistics and Clinical Trials</p> <p>Bartolini, Giulia; IRCCS Istituto Romagnolo per lo Studio dei Tumori Dino Amadori, Department of Medical Oncology</p> <p>Sullo, Francesco; IRCCS Istituto Romagnolo per lo Studio dei Tumori Dino Amadori, Department of Medical Oncology</p> <p>Anesi, Cecilia; Provincia autonoma di Trento Azienda Provinciale per i Servizi Sanitari, Department of Medical Oncology</p> <p>Dianti, Marco; Bruno Kessler Foundation, eHealth Unit</p> <p>Eccher, Claudio; Bruno Kessler Foundation, eHealth Unit</p> <p>Piras, Enrico; Bruno Kessler Foundation, eHealth Unit</p> <p>Gios, Lorenzo; TrentinoSalute 4.0, Competence Center for Digital Health</p> <p>Campomori, Annalisa; Presidio Ospedaliero Santa Chiara, Hospital Pharmacy Unit</p> <p>Oberosler, Valentina; Presidio Ospedaliero Santa Chiara, Hospital Pharmacy Unit</p> <p>Forti, Stefano; Bruno Kessler Foundation, eHealth Unit</p> |
| Keywords:                     | Information management < BIOTECHNOLOGY & BIOINFORMATICS, ONCOLOGY, ORAL MEDICINE                                                                                                                                                                                                                                                                                                                                                                                                                                                                                                                                                                                                                                                                                                                                                                                                                                                                                                                                                                                                                                                                                                                                                                                                                                                                                                                                                                                                                                                                                                                                                                                                                                                                                                                                                                                                                               |
|                               |                                                                                                                                                                                                                                                                                                                                                                                                                                                                                                                                                                                                                                                                                                                                                                                                                                                                                                                                                                                                                                                                                                                                                                                                                                                                                                                                                                                                                                                                                                                                                                                                                                                                                                                                                                                                                                                                                                                |

1  
2  
3  
4  
5  
6  
7  
8  
9  
10  
11  
12  
13  
14  
15  
16  
17  
18  
19  
20  
21  
22  
23  
24  
25  
26  
27  
28  
29  
30  
31  
32  
33  
34  
35  
36  
37  
38  
39  
40  
41  
42  
43  
44  
45  
46  
47  
48  
49  
50  
51  
52  
53  
54  
55  
56  
57  
58  
59  
60

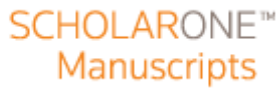

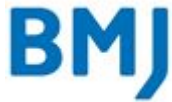

I, the Submitting Author has the right to grant and does grant on behalf of all authors of the Work (as defined in the below author licence), an exclusive licence and/or a non-exclusive licence for contributions from authors who are: i) UK Crown employees; ii) where BMJ has agreed a CC-BY licence shall apply, and/or iii) in accordance with the terms applicable for US Federal Government officers or employees acting as part of their official duties; on a worldwide, perpetual, irrevocable, royalty-free basis to BMJ Publishing Group Ltd ("BMJ") its licensees and where the relevant Journal is co-owned by BMJ to the co-owners of the Journal, to publish the Work in this journal and any other BMJ products and to exploit all rights, as set out in our [licence](#).

The Submitting Author accepts and understands that any supply made under these terms is made by BMJ to the Submitting Author unless you are acting as an employee on behalf of your employer or a postgraduate student of an affiliated institution which is paying any applicable article publishing charge ("APC") for Open Access articles. Where the Submitting Author wishes to make the Work available on an Open Access basis (and intends to pay the relevant APC), the terms of reuse of such Open Access shall be governed by a Creative Commons licence – details of these licences and which [Creative Commons](#) licence will apply to this Work are set out in our licence referred to above.

Other than as permitted in any relevant BMJ Author's Self Archiving Policies, I confirm this Work has not been accepted for publication elsewhere, is not being considered for publication elsewhere and does not duplicate material already published. I confirm all authors consent to publication of this Work and authorise the granting of this licence.

Original research

## **Advancing strategies to increase adherence to oral therapies in onco-hematology: protocol for a randomized controlled study**

Alessandro Passardi,<sup>1</sup> Patrizia Serra,<sup>2</sup> Orazio Caffo,<sup>3</sup> Carla Masini,<sup>4</sup> Erika Brugugnoli,<sup>4</sup> Roberto Vespignani,<sup>5</sup> Valeria Giardino,<sup>2</sup> Elisabetta Petracci,<sup>2</sup> Giulia Bartolini,<sup>1</sup> Francesco Sullo,<sup>1</sup> Cecilia Anesi,<sup>3</sup> Marco Dianti,<sup>6</sup> Claudio Eccher,<sup>6</sup> Enrico Maria Piras,<sup>6</sup> Lorenzo Gios,<sup>7</sup> Annalisa Campomori,<sup>8</sup> Valentina Oberosler,<sup>8</sup> Stefano Forti<sup>6</sup>

<sup>1</sup> Department of Medical Oncology, IRCCS Istituto Romagnolo per lo Studio dei Tumori (IRST) “Dino Amadori”, Meldola, Italy

<sup>2</sup> Unit of Biostatistics and Clinical Trials, IRCCS Istituto Romagnolo per lo Studio dei Tumori (IRST) “Dino Amadori”, Meldola, Italy

<sup>3</sup> Department of Medical Oncology, Azienda Provinciale per i Servizi Sanitari, Trento, Italy

<sup>4</sup> Oncology Pharmacy Unit, IRCCS Istituto Romagnolo per lo Studio dei Tumori (IRST) “Dino Amadori”, Meldola, Italy

<sup>5</sup> IT Service, IRCCS Istituto Romagnolo per lo Studio dei Tumori (IRST) “Dino Amadori”, Meldola, Italy

<sup>6</sup> Center for Information and Communication Technology, eHealth Unit, Fondazione “Bruno Kessler”, Trento, Italy

<sup>7</sup> TrentinoSalute 4.0, Competence Center for Digital Health, Trento, Italy

1  
2  
3  
4 <sup>8</sup> Hospital Pharmacy Unit, Trento General Hospital, Autonomous Province of Trento,  
5  
6 Trento, Italy  
7  
8  
9  
10

11 **Correspondence to:**

12  
13 Roberto Vespignani, B.Eng.

14  
15 IRCCS Istituto Romagnolo per lo Studio dei Tumori (IRST) “Dino Amadori”

16  
17 Via P. Maroncelli 40, 47014 Meldola (FC), Italy

18  
19  
20 Tel.: +39-0543-739100; fax: +39-0543-739151; e-mail: [roberto.vespignani@irst.emr.it](mailto:roberto.vespignani@irst.emr.it)  
21  
22  
23  
24  
25  
26  
27  
28  
29  
30  
31  
32  
33  
34  
35  
36  
37  
38  
39  
40  
41  
42  
43  
44  
45  
46  
47  
48  
49  
50  
51  
52  
53  
54  
55  
56  
57  
58  
59  
60

## ABSTRACT

**Introduction** The use of oral treatments is constantly growing in the area of oncology, raising adherence and safety issues. There is an increasing body of literature highlighting the importance of patient empowerment in the self-management of cancer therapies. Within this scenario, the ONCO-TreC platform was customized and fine-tuned through a prospective multicenter training-validation study in cancer patients treated with oral anticancer drugs.

**Methods and analysis** This prospective randomized trial was designed to compare the effectiveness of two different strategies, ie, an electronic diary (ONCO-TreC) and a paper diary, for the management of oral cancer treatments in patients with solid and hematological tumors. *Ad hoc* strategies are planned to measure and monitor adherence to treatment and to assess usability and acceptability of the electronic diary. Informed consent will be obtained from all study participants.

**Ethics and dissemination** This innovative eHealth system is expected to contribute to increasing the adherence to and safety of cancer care, promoting patient empowerment and improving patient-doctor communication. Ethical approval was obtained from Romagna Ethics Committee (CEROM), study ID 2108, prot. n. IRST 100.28 of 10/04/2020. Findings will be disseminated through peer-reviewed journals, conferences and event presentations.

**Trial registration number:** ClinicalTrials.gov NCT04826458

## Keywords

oral anticancer agents; home-based healthcare management; adherence; eHealth; patient empowerment

## Strengths and limitations of this study

- This multicenter randomized study is the first to compare the efficacy of an electronic diary with that of standard clinical practice;
- ONCO-TreC is expected to contribute to improving the adherence and safety of cancer care, promoting patient empowerment and patient-doctor communication;
- The limited number of cancer centers involved in the trial could make it difficult to transfer the results to the general population;
- The organizational model that includes the presence of the counsellor may not be applicable to all cancer centers.



## INTRODUCTION

The use of oral treatments is constantly increasing in the area of onco-hematology, raising adherence and safety issues.<sup>1-5</sup> Literature data show that there is enormous variability in adherence, with rates varying between 20% and 100%.<sup>6</sup> Given that poor adherence can have important consequences in terms of treatment efficacy and toxicity,<sup>7</sup> the concept of patient empowerment plays a key role in the self-management of therapies.<sup>8,9</sup>

Several trials have been carried out in recent years to evaluate interventions aimed at improving adherence to oral antineoplastic therapies, eg, educational support, treatment monitoring, pharmacy based and counselling programs, pre-filled pill boxes, and automated voice response systems.<sup>5</sup> To the best of our knowledge, no randomized trials have shown significant differences between intervention and control groups with respect to primary adherence outcomes. Two non-randomized cohort studies suggested a possible benefit in terms of adherence to oral antineoplastic therapy from their intervention programs with respect to retrospective control groups. In one study, a treatment monitoring program for patients undergoing erlotinib for advanced non small cell lung cancer was associated with significantly higher rates of adherence (as measured by both patient self report ( $p=0.042$ ) and pill count ( $p=0.002$ )) and disease control ( $p=0.037$ ).<sup>10</sup> In another trial, intensified multidisciplinary pharmaceutical care was associated with significantly higher mean daily adherence rates to oral capecitabine in a small cohort of patients with colorectal and breast cancer ( $p=0.029$ ).<sup>11</sup>

In clinical practice, a program that includes the presence of a counsellor and the delivery of a paper diary is generally considered an adequate standard of care. Within this context, 2.0 web solutions such as telemedicine, mobile health devices and applications (apps)

1  
2  
3  
4 might be useful to improve adherence to medication and to optimize shared management of  
5  
6 oral agents between patient and healthcare providers.<sup>10-17</sup>  
7

8  
9 The Center for Communication and Information Technology of Fondazione Bruno  
10  
11 Kessler (FBK-ICT) in Trento developed a monitoring system based on the TreC (CCC,  
12  
13 Citizen Clinical Record) platform to deliver mobile health services in different chronic  
14  
15 diseases, such as asthma, type 1 diabetes and hypertension.<sup>18,19</sup> The system was  
16  
17 subsequently adapted for home management and remote monitoring of oral anticancer  
18  
19 therapy (ONCO-TreC).  
20  
21

22  
23 ONCO-TreC was customized, fine-tuned and validated through a prospective  
24  
25 multicenter study in cancer patients treated with oral anticancer drugs [Passardi et al.,  
26  
27 *submitted*].<sup>20</sup> Forty patients were enrolled, and adherence to cancer treatment was >86%.  
28  
29 The ability of the system to measure adherence to treatment was high, with a concordance  
30  
31 of 97.3% (95 CI: 86.1%-99.9%) between investigator and system pill count. System  
32  
33 usability and acceptability were also very high. However, the small sample size and  
34  
35 absence of a control arm did not permit any definitive conclusions to be drawn about the  
36  
37 efficacy of the system in improving adherence.  
38  
39  
40

41  
42 The aim of the present study protocol and its primary endpoint is to compare the  
43  
44 effectiveness of two different strategies, ie, electronic diary (ONCO-TreC) and paper diary,  
45  
46 in improving adherence to oral cancer therapy in patients with solid and hematological  
47  
48 tumors.  
49

50  
51 Secondary endpoints of the study are as follows: (i) to identify the reasons for non-  
52  
53 adherence in each group of patients (eg, forgetting to take the pills, side-effects,  
54  
55 misunderstanding of the prescription); (ii) to describe the satisfaction of patients and  
56  
57  
58  
59  
60

1  
2  
3  
4 healthcare professionals with the different strategies by means of brief questionnaires and  
5 semi-structured interviews; (iii) to evaluate the impact of the lack of therapeutic adherence  
6 in terms of both costs for medicines and overall healthcare costs (eg, hospitalizations,  
7 health services, access to Emergency Room).  
8  
9  
10  
11  
12  
13  
14  
15

## 16 **METHODS AND ANALYSIS**

### 17 **Study design and participants**

18 The research is a prospective randomized, interventional, non-pharmacological, multicenter  
19 study on cancer patients receiving anticancer oral treatment.  
20  
21  
22  
23  
24  
25  
26

### 27 **Inclusion and exclusion criteria**

28 Inclusion criteria are defined as follows: adult  $\geq 18$  years old, either gender; Eastern  
29 Cooperative Oncology Group performance status (ECOG PS)  $\leq 2$ ; life expectancy  $> 12$   
30 weeks according to clinical judgment; patient candidate for treatment with an oral agent  
31 (adjuvant and advanced settings allowed); good understanding of the Italian language;  
32 ability to follow study procedures and manage mobile devices after a basic training course,  
33 at the investigator's discretion; written informed consent.  
34  
35  
36  
37  
38  
39  
40  
41  
42

43 Patients receiving an intravenous anticancer treatment as well as experimental drugs will  
44 be excluded to reduce potential confounding in evaluating the strategies.  
45  
46  
47  
48  
49

### 50 **Recruitment**

51 A total of 124 evaluable patients will be considered. Clinicians will identify potentially  
52 eligible patients, providing them with all the details pertaining to project participation, and  
53  
54  
55  
56  
57  
58  
59  
60

1  
2  
3  
4 collecting the signed informed consent.  
5  
6  
7

## 8 9 **Randomization**

10 After being approached for face-to-face screening and enrollment, participants will be  
11  
12 randomized to the intervention or control group across sites (1:1 randomization) according  
13  
14 to the following arms: A) electronic diary (ONCO-TreC APP); B) paper diary.  
15  
16

17  
18 Patients assigned to the electronic diary group will be equipped with a dedicated APP  
19  
20 (ONCO-TreC) and receive specific training on its use.  
21

22  
23 The researchers in charge of the randomization will not have any influence on the  
24  
25 routine care of patients, and participation in the project does not imply any significant  
26  
27 adjustment in the standard routine care.  
28  
29

## 30 31 32 **Patient and public involvement**

33  
34 No patient involved.  
35  
36  
37

## 38 39 **ONCO-TreC**

40  
41 ONCO-TreC consists of a mobile application (APP) delivered to patients and a web-based  
42  
43 dashboard managed by healthcare professionals. The APP contains a visual reminder of  
44  
45 cancer therapy, a simplified adverse event reporting system, a section for vital signs  
46  
47 entering, and a messaging system. Clinicians enter the details of oral treatment schedules  
48  
49 through the dashboard, set reminders, monitor for adherence to treatment and reported  
50  
51 adverse events, and can communicate with patients through the messaging system. A  
52  
53 detailed description of the ONCO-TreC has been reported elsewhere.<sup>20</sup>  
54  
55  
56  
57  
58  
59  
60

## Counsellor

Patients of both arms will be followed by a trained healthcare professional (counsellor) who will be responsible for drug and diary delivery. The counsellor will also train the patient and/or caregiver at the very first treatment cycle with regard to (i) therapy (dosage, duration, storage methods, etc.) and (ii) issues/adverse events reporting. The healthcare staff will instruct the patient to return all the drug packs received, even if empty, at each cycle, for pill count. In addition, the counsellor will obtain information from patients about any concomitant drugs used at home. All these procedures will take place inside an adequate and dedicated room.

## Study procedures

At the baseline visit, demographic data (age, sex, educational qualification and occupation), cancer history, and information on concomitant diseases and therapies will be collected; physical examination with vital signs and performance status assessment will be carried out. Patients assigned to arm A will be provided with the ONCO-TreC APP (installed on a smartphone or tablet), the oral drug for a treatment cycle and an appointment for the next cycle, and will be instructed on how to use the APP. Patients assigned to arm B will be provided with a paper diary, the oral medication and an appointment for the next cycle, and will be given instructions on how to use the paper diary.

During the patient's medical visits at each treatment cycle, adherence and adverse events will be reported in the patient's medical records, as per clinical practice. In addition, at each cycle the counsellor will check the patient's diary (paper or electronic), count any remaining tablets, and evaluate the need for retraining. Patients will also receive the drug

1  
2  
3  
4 supply for a new treatment cycle, the appointment for the next cycle and, for those in arm  
5  
6 B, a new paper diary.  
7

8  
9 The evaluation period will end after 6 cycles of therapy or before in the event of a  
10  
11 change of therapy (for disease progression or unacceptable toxicity) or patient refusal. Each  
12  
13 patient, once the planned 6-cycle phase is over, will continue the treatment, with visits and  
14  
15 procedures as per clinical practice.  
16

17  
18 Usability and acceptability of ONCO-TreC and paper diary by patients will be assessed  
19  
20 through 3 questionnaires: Q-pre and Q-post at baseline and at the end of observation (EoO);  
21  
22 and the Italian version of the System Usability Scale (SUS) at EoO.<sup>21</sup> Q-pre and Q-post are  
23  
24 *ad hoc* questionnaires developed to analyze patient expectations with regard to the system  
25  
26 (Q-pre) and to evaluate system acceptability (Q-post) and communication between patients  
27  
28 and cancer centers (Q-pre and Q-post). A subgroup of patients will also undergo semi-  
29  
30 structured interviews by FBK-ICT sociologists at EoO. These interviews will be conducted  
31  
32 by teleconference and will focus on healthcare practice and the use of the electronic or  
33  
34 paper diary. FBK-ICT sociologists will also conduct semi-structured interviews with the  
35  
36 oncologists, counsellors and healthcare professionals involved in the trial to evaluate the  
37  
38 impact of the technology on the workload, as well as patient-hospital communication,  
39  
40 adherence and adverse events management.  
41  
42  
43  
44  
45  
46  
47

#### 48 **Data management**

49

50 ONCO-TreC APP will communicate with a back-end service to store data on a central  
51  
52 server. Researchers will be able to evaluate capability data through a web-based dashboard.  
53

54 Data entered into the system or paper diary by the patient will be compared with those  
55  
56  
57  
58  
59  
60

1  
2  
3  
4 assessed by the oncologist and/or the counsellor. In particular, the adherence to treatment  
5 that emerges from diaries will be related to the number of residual pills returned during the  
6 hospital visit, and adverse events reported in the diaries will be compared to those reported  
7 to the oncologist and recorded in the medical records. Data will be registered in electronic  
8 case report forms, implemented using a relational database management system and a  
9 graphic user interface.  
10  
11  
12  
13  
14  
15  
16  
17  
18  
19

### 20 **Statistical Analysis**

21  
22 Adherence will be assessed at each treatment cycle by counting the remaining pills. Any  
23 patient who takes at least 90% of the total planned drug dose as per study protocol will be  
24 defined as adherent. Patients who take fewer tablets than prescribed due to toxicity or  
25 medical decision will be considered adherent if this decision is recorded in the medical  
26 records. The effectiveness of each experimental strategy will be evaluated by comparing  
27 the proportion of adherent patients in the corresponding groups.  
28  
29  
30  
31  
32  
33  
34  
35

36 Patient perception about ONCO-TreC or paper diary will be assessed through  
37 questionnaires. Two specific questionnaires (Q-pre, Q-post) will be administered to  
38 evaluate patient expectations about the system, system acceptability, quality of care and  
39 patient-doctor communication. An internationally validated SUS will be used to investigate  
40 system usability in the experimental arm. The semi-structured interviews will be audio-  
41 recorded, transcribed and assessed by the template analysis, a structured technique for the  
42 evaluation of qualitative data.  
43  
44  
45  
46  
47  
48  
49  
50  
51

52 The sample size was calculated assuming a percentage of non-adherence to oral therapy  
53 of 40% in arm B, and a 60% reduction in the percentage of non-adherent patients in arm A.  
54  
55  
56  
57  
58  
59  
60

1  
2  
3  
4 A sample consisting of 124 patients (62 patients for each arm) will provide 80% power to  
5  
6 identify an absolute difference greater than 24 percentage points using a bilateral Fisher's  
7  
8 exact test with a significance level of 0.05. Considering a dropout rate of 10%,  
9  
10 approximately 136 total patients will have to be enrolled.  
11

12  
13 The hypothesis relating to the primary endpoint of the study will be tested using Fisher's  
14  
15 exact test. The percentage of adherent patients in the 2 groups will be reported both as a  
16  
17 point estimate and by means of 95% confidence intervals. Secondary endpoints will be  
18  
19 reported through descriptive statistics: mean  $\pm$  standard deviation (sd) or median and  
20  
21 interquartile range for continuous variables, and absolute and relative frequency for  
22  
23 categorical variables.  
24  
25  
26  
27  
28

## 29 **ETHICS AND DISSEMINATION**

30  
31 This Italian multicenter randomized study, approved by the Romagna Ethics Committee  
32  
33 (CEROM), study ID 2108, prot. n. IRST 100.28 of 10/04/2020, will be conducted in  
34  
35 accordance with the Declaration of Helsinki and the Good Clinical Practice guidelines.  
36  
37 Informed consent will be obtained from all individual study participants before enrollment.  
38  
39

40  
41 Considering the impact of adherence to oral treatments in onco-hematology in terms of  
42  
43 treatment efficacy and toxicity, the validation of reliable and easy-to-use tools to improve  
44  
45 patients' self-management of therapies is essential.<sup>9</sup> Current literature supports the idea that  
46  
47 multilayer approaches including educational support, treatment monitoring, pharmacy  
48  
49 based and counselling programs are essential for improving adherence and, therefore,  
50  
51 treatment efficacy.<sup>5</sup> An increasing level of acceptance to m-health technologies in oncology  
52  
53 is being shown by patients and healthcare staff. However, despite the numerous studies  
54  
55  
56  
57  
58  
59  
60



1  
2  
3  
4 published on this issue, there is still a clear need to further promote the validation of  
5  
6 technological, organizational and m-health platforms (eg, APP) to support patients' self-  
7  
8 management, which is a key factor in sustaining proper treatment adherence.  
9

10  
11 The present multicenter randomized study represents a unique contribution in this area  
12  
13 in that it will be the first to compare the efficacy of an electronic diary with that of standard  
14  
15 clinical practice. The technological platform adopted, ONCO-TreC, evaluated in a previous  
16  
17 study,<sup>20</sup> is expected to contribute to further improving the adherence and safety of cancer  
18  
19 care, and promoting patient empowerment and patient-doctor communication. In addition,  
20  
21 the involvement of different stakeholders (eg, healthcare institutions, research centers)  
22  
23 represents a key element in ensuring a correct evaluation of the present trial. A specific  
24  
25 evaluation component has been designed to correctly assess the implementation of the  
26  
27 technological platform and the organizational aspects behind it. At the same time, the study  
28  
29 also has a number of limitations. The first concerns the small number of cancer centers  
30  
31 involved in the trial, which could arguably restrict the generalizability of results. Secondly,  
32  
33 the study design has been carefully adapted to the specific organizational contexts in which  
34  
35 the research will take place. Although this could represent a strength of the project in terms  
36  
37 of feasibility, an organizational model where a pharmacist counsellor plays a key role may  
38  
39 not be applicable or reproducible in all cancer centers.  
40  
41  
42  
43  
44

45  
46 The present trial holds great promise for substantially impacting and benefitting a large  
47  
48 audience. The results will be disseminated through peer-reviewed journals, conferences and  
49  
50 event presentations.  
51  
52  
53  
54  
55  
56  
57  
58  
59  
60

1  
2  
3  
4 **Acknowledgements:** The authors would like to acknowledge all their colleagues from the  
5  
6 different institutions who contributed to the study protocol.  
7  
8  
9

10  
11 **Contributors:** All authors participated in the design of the study and its organization and  
12  
13 implementation. The first draft of the manuscript was jointly written by AP and LG. All  
14  
15 authors contributed to editing subsequent drafts and all read and approved the final  
16  
17 manuscript for submission.  
18  
19

20  
21  
22  
23 **Funding:**

24  
25 This research received no specific grant from any funding agency in the public, commercial  
26  
27 or not-for-profit sectors.  
28  
29

30  
31  
32 **Competing interests:** None declared.  
33  
34  
35

36  
37 **Ethical statement:** This study was approved Ethical approval was obtained from Romagna  
38  
39 Ethics Committee (CEROM), study ID 2108, prot. n. IRST 100.28 of 10/04/2020, will be  
40  
41 conducted in accordance with the Declaration of Helsinki and the Good Clinical Practice  
42  
43 guidelines. Informed consent will be obtained from all individual study participants before  
44  
45 enrollment.  
46  
47  
48  
49

50  
51 **Data availability:** Data sharing is not applicable to this article as no new data were created  
52  
53 or analyzed.  
54  
55  
56  
57  
58  
59

**REFERENCES**

- 1 Osterberg L, Blaschke T. Adherence to medication. *N Engl J Med* 2005;353:487-97.
- 2 Brown MT, Bussell JK. Medication adherence: WHO cares? *Mayo Clin Proc* 2011;86:304-14.
- 3 Huang WC, Chen CY, Lin SJ, *et al.* Medication adherence to oral anticancer drugs: systematic review. *Expert Rev Anticancer Ther* 2016;16:423-32.
- 4 Bergsbaken JJ, Eickhoff JC, Buss BA, *et al.* Assessment of adherence with oral anticancer agents in oncology clinical trials: A systematic review. *J Oncol Pharm Pract* 2016;22:105-13.
- 5 Greer JA, Amoyal N, Nisotel L, *et al.* A Systematic Review of Adherence to Oral Antineoplastic Therapies. *Oncologist* 2016;21:354-76.
- 6 Fenerty SD, West C, Davis SA, *et al.* The effect of reminder systems on patients' adherence to treatment. *Patient Prefer Adherence* 2012;6:127-35.
- 7 Vervloet M, van Dijk L, Santen-Reestman J, *et al.* SMS reminders improve adherence to oral medication in type 2 diabetes patients who are real time electronically monitored. *Int J Med Inform* 2012;81:594-604.
- 8 Oakley C, Lennan E, Roe H, *et al.* Safe practice and nursing care of patients receiving oral anti-cancer medicines: a position statement from UKONS. *Ecancermedicalscience* 2010;4:177.
- 9 Mathes T, Antoine SL, Pieper D, *et al.* Adherence enhancing interventions for oral anticancer agents: a systematic review. *Cancer Treat Rev* 2014;40:102-8.
- 10 Gebbia V, Bellavia M, Banna GL, *et al.* Treatment monitoring program for implementation of adherence to second-line erlotinib for advanced non-small-cell lung

- 1  
2  
3  
4 cancer. *Clin Lung Cancer* 2013;14:390-8.  
5  
6  
7 11 Simons S, Ringsdorf S, Braun M, *et al*. Enhancing adherence to capecitabine  
8  
9 chemotherapy by means of multidisciplinary pharmaceutical care. *Support Care Cancer*  
10  
11 2011;19:1009-18.  
12  
13 12 Weaver A, Young AM, Rowntree J, *et al*. Application of mobile phone technology for  
14  
15 managing chemotherapy-associated side-effects. *Ann Oncol* 2007;18:1887-92.  
16  
17  
18 13 Paré G, Moqadem K, Pineau G, *et al*. Clinical effects of home telemonitoring in the  
19  
20 context of diabetes, asthma, heart failure and hypertension: a systematic review. *J Med*  
21  
22 *Internet Res* 2010;12:e21.  
23  
24  
25 14 Polisen J, Tran K, Cimon K, *et al*. Home telehealth for chronic obstructive pulmonary  
26  
27 disease: a systematic review and meta-analysis. *J Telemed Telecare* 2010;16:120-7.  
28  
29  
30 15 Polisen J, Tran K, Cimon K, *et al*. Home telemonitoring for congestive heart failure: a  
31  
32 systematic review and meta-analysis. *J Telemed Telecare* 2010;16:68-76.  
33  
34  
35 16 Galligioni E, Piras EM, Galvagni M, *et al*. Integrating mHealth in Oncology:  
36  
37 Experience in the Province of Trento. *J Med Internet Res* 2015;17:e114.  
38  
39  
40 17 Galligioni E, Berloff F, Caffo O, *et al*. Development and daily use of an electronic  
41  
42 oncological patient record for the total management of cancer patients: 7 years'  
43  
44 experience. *Ann Oncol* 2009;20:349-52.  
45  
46  
47 18 Eccher C, Gios L, Zanutto A, *et al*. TreC platform. An integrated and evolving care  
48  
49 model for patients' empowerment and data repository. *J Biomed Inform*  
50  
51 2020;102:103359.  
52  
53  
54 19 Eccher C, Piras EM, Stenico M. TreC - a REST-based regional PHR. *Stud Health*  
55  
56 *Technol Inform* 2011;169:108-12.  
57  
58  
59  
60

- 1  
2  
3  
4 20 Passardi A, Rizzo M, Maines F, *et al.* Optimisation and validation of a remote  
5  
6 monitoring system (Onco-TreC) for home-based management of oral anticancer  
7  
8 therapies: an Italian multicentre feasibility study. *BMJ Open* 2017;7:e014617.  
9  
10  
11 21 Brooke, J. SUS: A “quick and dirty” usability scale. In: Jordan PW, Thomas B,  
12  
13 Weerdmeester BA, editors. *Usability Evaluation in Industry*. London: Taylor & Francis;  
14  
15 1996:189-94.  
16  
17  
18  
19  
20  
21  
22  
23  
24  
25  
26  
27  
28  
29  
30  
31  
32  
33  
34  
35  
36  
37  
38  
39  
40  
41  
42  
43  
44  
45  
46  
47  
48  
49  
50  
51  
52  
53  
54  
55  
56  
57  
58  
59  
60

# BMJ Open

## Use of the ONCO-TreC electronic diary compared with a standard paper diary to improve adherence to oral cancer therapy in patients with solid and hematological tumors: protocol for a randomized controlled trial

|                                 |                                                                                                                                                                                                                                                                                                                                                                                                                                                                                                                                                                                                                                                                                                                                                                                                                                                                                                                                                                                                                                                                                                                                                                                                                                                                                                                                                                                                                                                                                                                                                                                                                                                                                                                                                                                                                                                                              |
|---------------------------------|------------------------------------------------------------------------------------------------------------------------------------------------------------------------------------------------------------------------------------------------------------------------------------------------------------------------------------------------------------------------------------------------------------------------------------------------------------------------------------------------------------------------------------------------------------------------------------------------------------------------------------------------------------------------------------------------------------------------------------------------------------------------------------------------------------------------------------------------------------------------------------------------------------------------------------------------------------------------------------------------------------------------------------------------------------------------------------------------------------------------------------------------------------------------------------------------------------------------------------------------------------------------------------------------------------------------------------------------------------------------------------------------------------------------------------------------------------------------------------------------------------------------------------------------------------------------------------------------------------------------------------------------------------------------------------------------------------------------------------------------------------------------------------------------------------------------------------------------------------------------------|
| Journal:                        | <i>BMJ Open</i>                                                                                                                                                                                                                                                                                                                                                                                                                                                                                                                                                                                                                                                                                                                                                                                                                                                                                                                                                                                                                                                                                                                                                                                                                                                                                                                                                                                                                                                                                                                                                                                                                                                                                                                                                                                                                                                              |
| Manuscript ID                   | bmjopen-2021-055814.R1                                                                                                                                                                                                                                                                                                                                                                                                                                                                                                                                                                                                                                                                                                                                                                                                                                                                                                                                                                                                                                                                                                                                                                                                                                                                                                                                                                                                                                                                                                                                                                                                                                                                                                                                                                                                                                                       |
| Article Type:                   | Protocol                                                                                                                                                                                                                                                                                                                                                                                                                                                                                                                                                                                                                                                                                                                                                                                                                                                                                                                                                                                                                                                                                                                                                                                                                                                                                                                                                                                                                                                                                                                                                                                                                                                                                                                                                                                                                                                                     |
| Date Submitted by the Author:   | 12-Nov-2021                                                                                                                                                                                                                                                                                                                                                                                                                                                                                                                                                                                                                                                                                                                                                                                                                                                                                                                                                                                                                                                                                                                                                                                                                                                                                                                                                                                                                                                                                                                                                                                                                                                                                                                                                                                                                                                                  |
| Complete List of Authors:       | <p>Passardi, Alessandro; IRCCS Istituto Romagnolo per lo Studio dei Tumori Dino Amadori, Department of Medical Oncology<br/> Serra, Patrizia; IRCCS Istituto Romagnolo per lo Studio dei Tumori Dino Amadori, Unit of Biostatistic and Clinical Trials<br/> Caffo, Orazio; Provincia autonoma di Trento Azienda Provinciale per i Servizi Sanitari, Department of Medical Oncology<br/> Masini, Carla; IRCCS Istituto Romagnolo per lo Studio dei Tumori Dino Amadori, Oncology Pharmacy Unit<br/> Brugugnoli, Erika; IRCCS Istituto Romagnolo per lo Studio dei Tumori Dino Amadori, Oncology Pharmacy Unit<br/> Vespignani, Roberto; IRCCS Istituto Romagnolo per lo Studio dei Tumori Dino Amadori, IT Service<br/> Giardino, Valeria; IRCCS Istituto Romagnolo per lo Studio dei Tumori Dino Amadori, Unit of Biostatistics and Clinical Trials<br/> Petracci, Elisabetta ; IRCCS Istituto Romagnolo per lo Studio dei Tumori Dino Amadori, Unit of Biostatistics and Clinical Trials<br/> Bartolini, Giulia; IRCCS Istituto Romagnolo per lo Studio dei Tumori Dino Amadori, Department of Medical Oncology<br/> Sullo, Francesco; IRCCS Istituto Romagnolo per lo Studio dei Tumori Dino Amadori, Department of Medical Oncology<br/> Anesi, Cecilia; Provincia autonoma di Trento Azienda Provinciale per i Servizi Sanitari, Department of Medical Oncology<br/> Dianti, Marco; Bruno Kessler Foundation, eHealth Unit<br/> Eccher, Claudio; Bruno Kessler Foundation, eHealth Unit<br/> Piras, Enrico; Bruno Kessler Foundation, eHealth Unit<br/> Gios, Lorenzo; TrentinoSalute 4.0, Competence Center for Digital Health<br/> Campomori, Annalisa; Presidio Ospedaliero Santa Chiara, Hospital Pharmacy Unit<br/> Oberosler, Valentina; Presidio Ospedaliero Santa Chiara, Hospital Pharmacy Unit<br/> Forti, Stefano; Bruno Kessler Foundation, eHealth Unit</p> |
| <b>Primary Subject Heading</b>: | Oncology                                                                                                                                                                                                                                                                                                                                                                                                                                                                                                                                                                                                                                                                                                                                                                                                                                                                                                                                                                                                                                                                                                                                                                                                                                                                                                                                                                                                                                                                                                                                                                                                                                                                                                                                                                                                                                                                     |
| Secondary Subject Heading:      | Health informatics, Haematology (incl blood transfusion)                                                                                                                                                                                                                                                                                                                                                                                                                                                                                                                                                                                                                                                                                                                                                                                                                                                                                                                                                                                                                                                                                                                                                                                                                                                                                                                                                                                                                                                                                                                                                                                                                                                                                                                                                                                                                     |
| Keywords:                       | Information management < BIOTECHNOLOGY & BIOINFORMATICS,                                                                                                                                                                                                                                                                                                                                                                                                                                                                                                                                                                                                                                                                                                                                                                                                                                                                                                                                                                                                                                                                                                                                                                                                                                                                                                                                                                                                                                                                                                                                                                                                                                                                                                                                                                                                                     |

1  
2  
3  
4  
5  
6  
7  
8  
9  
10  
11  
12  
13  
14  
15  
16  
17  
18  
19  
20  
21  
22  
23  
24  
25  
26  
27  
28  
29  
30  
31  
32  
33  
34  
35  
36  
37  
38  
39  
40  
41  
42  
43  
44  
45  
46  
47  
48  
49  
50  
51  
52  
53  
54  
55  
56  
57  
58  
59  
60

|  |                         |
|--|-------------------------|
|  | ONCOLOGY, ORAL MEDICINE |
|  |                         |

SCHOLARONE™  
Manuscripts



I, the Submitting Author has the right to grant and does grant on behalf of all authors of the Work (as defined in the below author licence), an exclusive licence and/or a non-exclusive licence for contributions from authors who are: i) UK Crown employees; ii) where BMJ has agreed a CC-BY licence shall apply, and/or iii) in accordance with the terms applicable for US Federal Government officers or employees acting as part of their official duties; on a worldwide, perpetual, irrevocable, royalty-free basis to BMJ Publishing Group Ltd ("BMJ") its licensees and where the relevant Journal is co-owned by BMJ to the co-owners of the Journal, to publish the Work in this journal and any other BMJ products and to exploit all rights, as set out in our [licence](#).

The Submitting Author accepts and understands that any supply made under these terms is made by BMJ to the Submitting Author unless you are acting as an employee on behalf of your employer or a postgraduate student of an affiliated institution which is paying any applicable article publishing charge ("APC") for Open Access articles. Where the Submitting Author wishes to make the Work available on an Open Access basis (and intends to pay the relevant APC), the terms of reuse of such Open Access shall be governed by a Creative Commons licence – details of these licences and which [Creative Commons](#) licence will apply to this Work are set out in our licence referred to above.

Other than as permitted in any relevant BMJ Author's Self Archiving Policies, I confirm this Work has not been accepted for publication elsewhere, is not being considered for publication elsewhere and does not duplicate material already published. I confirm all authors consent to publication of this Work and authorise the granting of this licence.



1  
2  
3  
4 1 Original research  
5  
6

7 2

8  
9 **3 Use of the ONCO-TreC electronic diary compared with a**  
10  
11  
12 **4 standard paper diary to improve adherence to oral cancer**  
13  
14  
15 **5 therapy in patients with solid and hematological tumors:**  
16  
17  
18 **6 protocol for a randomized controlled trial**  
19  
20  
21  
22

23 8 Alessandro Passardi,<sup>1</sup> Patrizia Serra,<sup>2</sup> Orazio Caffo,<sup>3</sup> Carla Masini,<sup>4</sup> Erika Brugugnoli,<sup>4</sup>

24  
25 9 Roberto Vespignani,<sup>5</sup> Valeria Giardino,<sup>2</sup> Elisabetta Petracci,<sup>2</sup> Giulia Bartolini,<sup>1</sup> Francesco

26  
27  
28 10 Sullo,<sup>1</sup> Cecilia Anesi,<sup>3</sup> Marco Dianti,<sup>6</sup> Claudio Eccher,<sup>6</sup> Enrico Maria Piras,<sup>6</sup> Lorenzo Gios,<sup>7</sup>

29  
30 11 Annalisa Campomori,<sup>8</sup> Valentina Oberosler,<sup>8</sup> Stefano Forti<sup>6</sup>  
31  
32

33 12

34  
35 13 <sup>1</sup> Department of Medical Oncology, IRCCS Istituto Romagnolo per lo Studio dei Tumori  
36  
37 14 (IRST) “Dino Amadori”, Meldola, Italy

38  
39 15 <sup>2</sup> Unit of Biostatistics and Clinical Trials, IRCCS Istituto Romagnolo per lo Studio dei  
40  
41 16 Tumori (IRST) “Dino Amadori”, Meldola, Italy

42  
43  
44 17 <sup>3</sup> Department of Medical Oncology, Azienda Provinciale per i Servizi Sanitari, Trento, Italy

45  
46 18 <sup>4</sup> Oncology Pharmacy Unit, IRCCS Istituto Romagnolo per lo Studio dei Tumori (IRST)  
47  
48 19 “Dino Amadori”, Meldola, Italy

49  
50  
51 20 <sup>5</sup> IT Service, IRCCS Istituto Romagnolo per lo Studio dei Tumori (IRST) “Dino Amadori”,  
52  
53 21 Meldola, Italy  
54  
55  
56  
57  
58  
59  
60

1  
2  
3  
4 22 <sup>6</sup> Center for Information and Communication Technology, eHealth Unit, Fondazione  
5

6  
7 23 “Bruno Kessler”, Trento, Italy  
8

9 24 <sup>7</sup> TrentinoSalute 4.0, Competence Center for Digital Health, Trento, Italy  
10

11 25 <sup>8</sup> Hospital Pharmacy Unit, Trento General Hospital, Autonomous Province of Trento,  
12

13 26 Trento, Italy  
14  
15

16 27  
17

18 28 **Correspondence to:**

19  
20 29 Roberto Vespignani, B.Eng.  
21

22 30 IRCCS Istituto Romagnolo per lo Studio dei Tumori (IRST) “Dino Amadori”  
23

24 31 Via P. Maroncelli 40, 47014 Meldola (FC), Italy  
25  
26

27 32 Tel.: +39-0543-739100; fax: +39-0543-739151; e-mail: [roberto.vespignani@irst.emr.it](mailto:roberto.vespignani@irst.emr.it)  
28  
29  
30  
31  
32  
33  
34  
35  
36  
37  
38  
39  
40  
41  
42  
43  
44  
45  
46  
47  
48  
49  
50  
51  
52  
53  
54  
55  
56  
57  
58  
59  
60

1  
2  
3  
4 33 **ABSTRACT**

5  
6 34 **Introduction** ONCO-TreC platform consists of a mobile application delivered to patients  
7  
8  
9 35 as electronic diary and a web-based dashboard managed by healthcare professionals. We  
10  
11 36 aim to compare the effectiveness of ONCO-TreC electronic diary with a standard paper  
12  
13 37 diary, in improving adherence to oral cancer therapy in patients with solid and  
14  
15  
16 38 haematological tumors.

17  
18 39 **Methods and analysis** This is an open label, superiority, randomised controlled trial  
19  
20 40 conducted in 2 Italian Oncology Units. Patients will be randomized with a 1:1 ratio to  
21  
22 41 electronic or paper diary. For both groups a counsellor will be responsible for drug and  
23  
24 42 diary delivery. The evaluation period will end after 6 cycles of therapy. The primary aim is  
25  
26 43 to compare the proportion of non-adherent patients in the two arms. Adherence will be  
27  
28 44 measured through pill count; anyone who takes less than 90% of the total prescribed drug  
29  
30 45 dose will be considered non-adherent. Assuming a percentage of non-adherent patients to  
31  
32 46 oral therapy of 40% in arm B, and a 60% reduction in this percentage in arm A, a sample of  
33  
34 47 124 patients will provide 80% power to identify an absolute difference greater than 24  
35  
36 48 percentage points using a bilateral Fisher's exact test with a significance level of 0.05.  
37  
38 49 Considering a dropout rate of 10%, approximately 136 patients will have to be enrolled.  
39  
40  
41 50 The primary analysis will be performed on the intention-to-treat population. Secondary  
42  
43 51 aims are to describe the reasons for non-adherence, the level of satisfaction of patients and  
44  
45 52 healthcare professionals with the paper and electronic diary, and the impact of non-  
46  
47  
48 53 adherence in terms of healthcare costs.

49  
50  
51 54 **Ethics and dissemination** Ethical approval was obtained from Romagna Ethics Committee  
52  
53 55 (CEROM), study ID 2108, prot. n. IRST 100.28 of 10/04/2020. Informed consent will be  
54  
55  
56  
57  
58  
59  
60

1  
2  
3  
4 56 obtained from all study participants. Findings will be disseminated through peer-reviewed  
5  
6 57 journals, conferences and event presentations.  
7  
8

9 58

10  
11 59 **Protocol version:** V.2, 6 April 2021  
12

13 60 **Trial registration number:** ClinicalTrials.gov NCT04826458  
14  
15

16 61

## 17 62 **Keywords**

18  
19  
20 63 oral anticancer agents; home-based healthcare management; adherence; eHealth; patient  
21  
22 64 empowerment  
23  
24

25 65

## 26 66 **Strengths and limitations of this study**

- 27  
28  
29  
30 67 • This multicenter randomized study is the first to compare the efficacy of an electronic  
31  
32 68 diary with that of standard clinical practice.  
33  
34 69 • The majority of cancer patients use smart phones or tablets on a regular basis.  
35  
36  
37 70 • Methodological strengths include sample size and randomization, rigorous  
38  
39 71 measurement of adherence, wide qualitative data deriving from questionnaires and semi  
40  
41 72 structured interviews.  
42  
43  
44 73 • The limited number of cancer centers involved in the trial could make it difficult to  
45  
46 74 generalize the results to the general population.  
47  
48 75 • The organizational model that includes the presence of the counsellor may not be  
49  
50 76 applicable to all cancer centers.  
51  
52  
53  
54  
55  
56  
57  
58  
59  
60

## 77 INTRODUCTION

78 The use of oral treatments is constantly increasing in the area of onco-hematology, raising  
79 adherence and safety issues.<sup>1-5</sup> Literature data show that there is enormous variability in  
80 adherence, with rates varying between 20% and 100%.<sup>6</sup> Given that poor adherence can  
81 have important consequences in terms of treatment efficacy and toxicity,<sup>7</sup> the concept of  
82 patient empowerment plays a key role in the self-management of therapies.<sup>8,9</sup>

83 Several trials have been carried out in recent years to evaluate interventions aimed at  
84 improving adherence to oral antineoplastic therapies, eg, educational support, counselling  
85 programs, pre-filled pill boxes, and automated voice response systems.<sup>5</sup> To the best of our  
86 knowledge, no randomized trials have been performed to evaluate the difference between  
87 intervention and control groups with respect to primary adherence outcomes. Two non-  
88 randomized cohort studies showed a benefit in terms of adherence to oral antineoplastic  
89 therapy from their intervention programs with respect to retrospective control groups. In  
90 one study, a treatment monitoring program, where the patient and the caregiver were  
91 extensively informed about drug characteristics and potential side effects and trained in  
92 their management, was provided to patients undergoing erlotinib for advanced non small  
93 cell lung cancer; this intervention was associated with significantly higher rates of  
94 adherence - as measured by both patient self report ( $p=0.042$ ) and pill count ( $p=0.002$ ) -  
95 and disease control ( $p=0.037$ ).<sup>10</sup> In another trial, intensified multidisciplinary  
96 pharmaceutical care was associated with significantly higher mean daily adherence rates to  
97 oral capecitabine in a small cohort of patients with colorectal and breast cancer ( $p=0.029$ ).<sup>11</sup>

98 In clinical practice, a program that includes the presence of a counsellor and the delivery  
99 of a paper diary is generally considered an adequate standard of care. Within this context,

1  
2  
3  
4 100 2.0 web solutions such as telemedicine, mobile health devices and applications (apps)  
5  
6 101 might be useful to improve adherence to medication and to optimize shared management of  
7  
8  
9 102 oral agents between patient and healthcare providers.<sup>10-17</sup>

10  
11 103 The Center for Communication and Information Technology of Fondazione Bruno  
12  
13 104 Kessler (FBK-ICT) in Trento developed a monitoring system based on the TreC (CCC,  
14  
15 105 Citizen Clinical Record) platform to deliver mobile health services in different chronic  
16  
17 106 diseases, such as asthma, type 1 diabetes and hypertension.<sup>18,19</sup> The system was  
18  
19  
20 107 subsequently adapted for home management and remote monitoring of oral anticancer  
21  
22 108 therapy (ONCO-TreC).

23  
24  
25 109 ONCO-TreC was customized, fine-tuned and validated through a prospective  
26  
27 110 multicenter study in cancer patients treated with oral anticancer drugs.<sup>20</sup> Forty patients were  
28  
29 111 enrolled, and adherence to cancer treatment was >86%. The ability of the system to  
30  
31 112 measure adherence to treatment was high, with a concordance of 97.3% (95 CI: 86.1%-  
32  
33 113 99.9%) between investigator and system pill count. System usability and acceptability were  
34  
35 114 also very high. However, the small sample size and absence of a control arm did not permit  
36  
37 115 any definitive conclusions to be drawn about the efficacy of the system in improving  
38  
39 116 adherence [Passardi et al., *submitted*].

40  
41  
42  
43 117 The aim of the present study is to compare the effectiveness of two different strategies,  
44  
45 118 ie, electronic diary and paper diary, in improving adherence to oral cancer therapy in  
46  
47 119 patients with solid and hematological tumors.

48  
49  
50 120  
51  
52 121  
53  
54  
55 122

## 123 **METHODS AND ANALYSIS**

### 124 **Study design and participants**

125 The research is an Italian prospective open label, superiority, randomized, interventional,  
126 non-pharmacological, multicenter clinical study on cancer patients receiving anticancer oral  
127 treatment.

### 129 **Inclusion and exclusion criteria**

130 Inclusion criteria are defined as follows: adult  $\geq 18$  years old, either gender; Eastern  
131 Cooperative Oncology Group performance status (ECOG PS)  $\leq 2$ ; life expectancy  $> 12$   
132 weeks according to clinical judgment; patient candidate for treatment with an oral agent  
133 (adjuvant and advanced settings allowed); good understanding of the Italian language;  
134 ability to follow study procedures and manage mobile devices after a basic training course,  
135 at the investigator's discretion; written informed consent.

136 Patients receiving an intravenous anticancer treatment as well as experimental drugs will  
137 be excluded to reduce potential confounding in evaluating the strategies.

### 139 **Recruitment**

140 This study will be jointly conducted at 2 Italian cancer care and research centers: IRCCS  
141 Istituto Romagnolo per lo Studio dei Tumori (IRST) "Dino Amadori", Meldola; Oncology  
142 Unit of the Azienda Provinciale per i Servizi Sanitari (APSS) in Trento. Clinicians will  
143 identify potentially eligible patients, providing them with all the details pertaining to  
144 project participation, and collecting the signed informed consent. Recruitment started in  
145 May 2021 and is expected to last 24 months. Total study duration is 36 months.

## 146 **Randomization**

147 After being approached for face-to-face screening and enrollment, participants will be  
148 randomized to the intervention or control group across sites (1:1 ratio), according to the  
149 following arms: A) electronic diary (ONCO-TreC APP); B) paper diary. A permuted block  
150 unstratified randomization procedure, with block sizes randomly varying between 4 and 6,  
151 will be used. The randomization sequence will be computer-generated by the Biostatistics  
152 and Clinical Trials Unit of IRST and implemented using centralized controlled website  
153 randomization service and electronic data capture system (OpenClinica V.3.12.2). The  
154 investigators will not have access to the randomization list.

155 Patients assigned to the electronic diary group will be equipped with a dedicated APP  
156 (ONCO-TreC) and receive specific training on its use. The researchers in charge of the  
157 randomization will not have any influence on the routine care of patients, and participation  
158 in the project does not imply any significant adjustment in the standard routine care.

159

## 160 **Patient and public involvement**

161 No patient involved.

162

## 163 **ONCO-TreC and paper diary**

164 ONCO-TreC consists of a mobile application (APP) delivered to patients and a web-based  
165 dashboard managed by healthcare professionals. The APP contains a visual reminder of  
166 cancer therapy, a simplified adverse event reporting system, a section for vital signs  
167 entering, and a messaging system. Clinicians enter the details of oral treatment schedules



1  
2  
3  
4 168 through the dashboard, set reminders, monitor for adherence to treatment and reported  
5  
6 169 adverse events, and can communicate with patients through the messaging system. A  
7  
8  
9 170 detailed description of the ONCO-TreC has been reported elsewhere.<sup>20</sup>  
10

11 171 Each study center will provide patients in the control arm with a paper diary according  
12  
13 172 to clinical practice. This diary must contain some essential information, e.g. drug name,  
14  
15 173 dosage, dates of administration. There is also a section for reporting any side effects and  
16  
17 174 notes.  
18  
19

20 175  
21

## 22 176 **Counsellor**

23  
24 177 Patients of both arms will be followed by a trained healthcare professional (counsellor) who  
25  
26 178 will be responsible for drug and diary delivery. The counsellor will also train the patient  
27  
28 179 and/or caregiver at the very first treatment cycle with regard to (i) therapy (dosage,  
29  
30 180 duration, storage methods, etc.) and (ii) issues/adverse events reporting. The healthcare  
31  
32 181 staff will instruct the patient to return all the drug packs received, even if empty, at each  
33  
34 182 cycle, for pill count. In addition, the counsellor will obtain information from patients about  
35  
36 183 any concomitant drugs used at home. All these procedures will take place inside an  
37  
38 184 adequate and dedicated room.  
39  
40  
41  
42

43 185  
44

## 45 186 **Study procedures**

46  
47 187 At the baseline visit, demographic data (age, sex, educational qualification and occupation),  
48  
49 188 cancer history, and information on concomitant diseases and therapies will be collected;  
50  
51 189 physical examination with vital signs and performance status assessment will be carried  
52  
53  
54 190 out. Patients assigned to arm A will be provided with the ONCO-TreC APP (installed on a  
55  
56  
57

1  
2  
3  
4 191 smartphone or tablet), the oral drug for a treatment cycle and an appointment for the next  
5  
6 192 cycle, and will be instructed on how to use the APP. Patients assigned to arm B will be  
7  
8  
9 193 provided with a paper diary, the oral medication and an appointment for the next cycle, and  
10  
11 194 will be given instructions on how to use the paper diary.

12  
13 195 During the patient's medical visits at each treatment cycle, adherence and adverse events  
14  
15 196 will be reported in the patient's medical records, as per clinical practice. In addition, at each  
16  
17 197 cycle the counsellor will check the patient's diary (paper or electronic), count any  
18  
19 198 remaining tablets, and evaluate the need for retraining. Patients will also receive the drug  
20  
21 199 supply for a new treatment cycle, the appointment for the next cycle and, for those in arm  
22  
23 200 B, a new paper diary.

24  
25  
26  
27 201

## 28 29 202 **Outcome measures**

30  
31 203 The primary outcome of the trial is to compare the proportion of non-adherent patients in  
32  
33 204 the experimental and control arms. Adherence will be assessed at each treatment cycle by  
34  
35 205 counting the remaining pills. Any patient who takes less than 90% of the total planned drug  
36  
37 206 dose during the study period as per study protocol will be defined as non-adherent. Patients  
38  
39 207 who take fewer tablets than prescribed due to toxicity or medical decision will be  
40  
41 208 considered adherent if this decision is recorded in the medical records. The evaluation  
42  
43 209 period will end after 6 cycles of therapy or earlier due to a therapy change for disease  
44  
45 210 progression or unacceptable toxicity or patient refusal. Each patient, once the planned 6-  
46  
47 211 cycle phase is over, will continue the treatment, with visits and procedures as per clinical  
48  
49 212 practice.

50  
51 213 As for the secondary aims, the reasons for non-adherence (eg, forgetting to take the pills,  
52  
53  
54  
55  
56  
57  
58  
59  
60

1  
2  
3  
4 214 side-effects, misunderstanding of the prescription) will be registered in the medical records  
5  
6 215 by the counselor during each cycle visit and summarized through percentages (ie.  
7  
8  
9 216 percentage of non-adherent patients by cause and study arm).

10  
11 217 Usability and acceptability of ONCO-TreC and paper diary by patients will be assessed  
12  
13 218 through 3 questionnaires: Q-pre and Q-post administered at baseline and at the end of  
14  
15 219 observation (EoO); and the Italian version of the System Usability Scale (SUS) at EoO.<sup>21</sup>  
16  
17 220 Q-pre and Q-post are *ad hoc* questionnaires developed to analyze patient expectations with  
18  
19 221 regard to the system (Q-pre) and to evaluate system acceptability (Q-post) and  
20  
21 222 communication between patients and cancer centers (Q-pre and Q-post) through 4-point  
22  
23 223 Likert scale questions as well as open-ended questions. Answers will be reported in terms  
24  
25 224 of percentages. The data from SUS questionnaire will be summarized by first summing, for  
26  
27 225 each patient, the score contributions from each item. For items 1, 3, 5, 7, and 9 the score  
28  
29 226 contribution is given by subtracting 1 to the scale position. For items 2, 4, 6, 8, and 10, the  
30  
31 227 contribution is 5 minus the scale position. Then, multiplying by 2.5 the sum of the score  
32  
33 228 contributions. The overall system usability level will be averaged over all patients  
34  
35 229 randomized to Arm A.

36  
37  
38  
39 230 A subgroup of patients will also undergo semi-structured interviews by FBK-ICT  
40  
41 231 sociologists at EoO. These interviews will be conducted by teleconference and will focus  
42  
43 232 on healthcare practice and the use of the electronic or paper diary. FBK-ICT sociologists  
44  
45 233 will also conduct semi-structured interviews with the oncologists, counsellors and  
46  
47 234 healthcare professionals involved in the trial to evaluate the impact of the technology on the  
48  
49 235 workload, as well as patient-hospital communication, adherence and adverse events  
50  
51 236 management. The semi-structured interviews will be audio-recorded, transcribed and  
52  
53  
54  
55  
56  
57  
58  
59  
60

1  
2  
3  
4 237 assessed by the template analysis, a structured technique for the evaluation of qualitative  
5  
6 238 data.

7  
8  
9 239 The costs for medicines and for hospital resource utilization (eg, hospitalizations, access  
10  
11 240 to the emergency room) will be assessed for patients enrolled at IRST and resident in the  
12  
13 241 Emilia-Romagna Region only. Administrative sources such as the pharmacy dispensing  
14  
15 242 database, hospital discharge cards, and the outpatient specialist assistance services database  
16  
17 243 will be considered. The costs for healthcare procedures will be measured according to the  
18  
19 244 regional Healthcare Range of Outpatients Fees, in order to estimate the cost actually  
20  
21 245 incurred by the healthcare provider, while for inpatient setting, we will compute the entire  
22  
23 246 DRG (Diagnosis Related Group)-related costs. Unit costs for drugs will be acquired from  
24  
25 247 the national pharmaceutical formulary drafted by the Italian Medicines Agency (AIFA).  
26  
27 248 Costs will be assessed on a per-patient per-month (PPPM) basis and summarized as  
28  
29 249 follows: (total amount of costs from the start of intervention start until its end/days from the  
30  
31 250 start of intervention until its end)  $\times$  30.  
32  
33  
34  
35  
36  
37  
38

## 39 252 **Data management**

40  
41 253 ONCO-TreC APP will communicate with a back-end service to store data on a central  
42  
43 254 server. Researchers will be able to evaluate capability data through a web-based dashboard.  
44  
45 255 Data entered into the system or paper diary by the patient will be compared with those  
46  
47 256 assessed by the oncologist and/or the counsellor. In particular, the adherence to treatment  
48  
49 257 that emerges from diaries will be related to the number of residual pills returned during the  
50  
51 258 hospital visit, and adverse events reported in the diaries will be compared to those reported  
52  
53  
54  
55 259 to the oncologist and recorded in the medical records. Data will be registered in electronic  
56  
57  
58  
59  
60

1  
2  
3  
4 260 case report forms, implemented using a relational database management system and a  
5  
6 261 graphic user interface (OpenClinica V.3.12.2).  
7  
8

9 262

### 10 263 **Statistical Analysis**

11  
12  
13 264 The sample size was calculated assuming a percentage of non-adherence to oral therapy of  
14  
15 265 40% in arm B, and a 60% reduction in the percentage of non-adherent patients in arm A. A  
16  
17 266 sample consisting of 124 patients (62 patients for each arm) will provide 80% power to  
18  
19 267 identify an absolute difference greater than 24 percentage points using a bilateral Fisher's  
20  
21 268 exact test with a significance level of 0.05. Considering a dropout rate of 10%,  
22  
23 269 approximately 136 total patients will have to be enrolled.  
24  
25  
26

27 270 The main study hypothesis will be tested using Fisher's exact test. The percentage of  
28  
29 271 non-adherent patients in the 2 groups will be reported both as a point estimate and by  
30  
31 272 means of 95% confidence intervals in the intention-to-treat population. Secondary  
32  
33 273 outcomes will be reported through descriptive statistics: mean  $\pm$  standard deviation (sd) or  
34  
35 274 median and interquartile range for continuous variables, and absolute and relative  
36  
37 275 frequency for categorical variables. Such descriptive statistics will be computed on the  
38  
39 276 overall population, by patient randomization arm, and other clinical characteristics, as  
40  
41 277 appropriate.  
42  
43  
44

45 278

### 46 279 **ETHICS AND DISSEMINATION**

47  
48  
49 280 This Italian multicenter randomized study, approved by the Romagna Ethics Committee  
50  
51 281 (CEROM), study ID 2108, prot. n. IRST 100.28 of 10/04/2020, will be conducted in  
52  
53 282 accordance with the Declaration of Helsinki and the Good Clinical Practice guidelines.  
54  
55  
56  
57  
58  
59  
60

1  
2  
3  
4 283 Informed consent will be obtained from all individual study participants before enrollment.  
5

6 284 The results will be disseminated through peer-reviewed journals, conferences and event  
7  
8 285 presentations. All information and documentation provided to investigators are considered  
9  
10 286 confidential and cannot be given or disclosed to third parties. The investigators will prepare  
11  
12 287 and maintain adequate and accurate source documents designed to record all observations  
13  
14 288 and other pertinent data for each patient. Only the study promoter staff will have access to  
15  
16 289 the final dataset containing pseudonymized data.  
17  
18  
19

20 290 Any study modification will be notified to the pertinent Ethics Committee through an  
21  
22 291 amendment.  
23  
24

25 292

## 27 293 **DISCUSSION**

28  
29 294 Considering the impact of adherence to oral treatments in onco-hematology in terms of  
30  
31 295 treatment efficacy and toxicity, the validation of reliable and easy-to-use tools to improve  
32  
33 296 patients' self-management of therapies is essential.<sup>9</sup> Current literature supports the idea that  
34  
35 297 multilayer approaches including educational support, treatment monitoring, pharmacy  
36  
37 298 based and counselling programs are essential for improving adherence and, therefore,  
38  
39 299 treatment efficacy.<sup>5</sup> An increasing level of acceptance to m-health technologies in oncology  
40  
41  
42 300 is being shown by patients and healthcare staff. However, despite the numerous studies  
43  
44 301 published on this issue, there is still a clear need to further promote the validation of  
45  
46 302 technological, organizational and m-health platforms (eg, APP) to support patients' self-  
47  
48 303 management, which is a key factor in sustaining proper treatment adherence<sup>22</sup>.  
49  
50

51  
52 304 The present multicenter randomized study represents a unique contribution in this area  
53  
54 305 in that it will be the first to compare the efficacy of an electronic diary with that of standard  
55  
56  
57  
58  
59  
60

1  
2  
3  
4 306 clinical practice. Nowadays, the majority of cancer patients, even the elderly, use smart  
5  
6 307 phones or tablets on a regular basis. The technological platform adopted, ONCO-TreC,  
7  
8 308 evaluated in a previous study,<sup>20</sup> is expected to contribute to further improving the adherence  
9  
10 309 and safety of cancer care, and promoting patient empowerment and patient-doctor  
11  
12 310 communication. The methodological strengths of the present trial include the sample size  
13  
14 311 and randomization of patients, a rigorous measurement of adherence, and the analysis of  
15  
16 312 qualitative data deriving from questionnaires and semi structured interviews. In addition,  
17  
18 313 the involvement of different stakeholders (eg, healthcare institutions, research centers)  
19  
20 314 represents a key element in ensuring a correct evaluation of the present trial. At the same  
21  
22 315 time, the study also has a number of limitations. The first concerns the small number of  
23  
24 316 cancer centers involved in the trial, which could arguably restrict the generalizability of  
25  
26 317 results. Secondly, the study design has been carefully adapted to the specific organizational  
27  
28 318 contexts in which the research will take place. Although this could represent a strength of  
29  
30 319 the project in terms of feasibility, an organizational model where a pharmacist counsellor  
31  
32 320 plays a key role may not be applicable or reproducible in all cancer centers.  
33  
34  
35  
36  
37  
38  
39  
40  
41  
42  
43  
44  
45  
46  
47  
48  
49  
50  
51  
52  
53  
54  
55  
56  
57  
58  
59  
60

1  
2  
3  
4  
5  
6  
7 321 **Acknowledgements:** The authors would like to acknowledge all their colleagues from the  
8  
9 322 different institutions who contributed to the study protocol.

10  
11 323 **Contributors:** PS, AP, RV and SF conceived the idea for the study; AP, PS, RV, CM, OC,  
12  
13 324 EP and SF designed the study; AP, EMP and PS took care of questionnaires and semi  
14  
15 325 structured interviews; RV, CE and MD contributed to ONCO-TreC fine-tuning and  
16  
17 326 implementations; CM, AC, EB and VB contributed to the definition of roles and  
18  
19 327 responsibilities of the counselor; VG, GB, FS and CA critically reviewed and revised the  
20  
21 328 protocol drafts; EP performed the statistical analyses. The first draft of the manuscript was  
22  
23 329 jointly written by AP, EP and LG. All authors participated in the organization of the study.  
24  
25  
26 330 All authors contributed to editing subsequent drafts and all read and approved the final  
27  
28 331 manuscript for submission.

29  
30  
31  
32 332 **Ethical statement:** This study was approved Ethical approval was obtained from Romagna  
33  
34 333 Ethics Committee (CEROM), study ID 2108, prot. n. IRST 100.28 of 10/04/2020, will be  
35  
36 334 conducted in accordance with the Declaration of Helsinki and the Good Clinical Practice  
37  
38 335 guidelines. Informed consent will be obtained from all individual study participants before  
39  
40 336 enrollment.

41  
42  
43 337 **Competing interests:** None declared.

44  
45  
46 338 **Funding:** This research received no specific grant from any funding agency in the public,  
47  
48 339 commercial or not-for-profit sectors.



341 **REFERENCES**

- 342 1 Osterberg L, Blaschke T. Adherence to medication. *N Engl J Med* 2005;353:487-97.
- 343 2 Brown MT, Bussell JK. Medication adherence: WHO cares? *Mayo Clin Proc*  
344 2011;86:304-14.
- 345 3 Huang WC, Chen CY, Lin SJ, *et al.* Medication adherence to oral anticancer drugs:  
346 systematic review. *Expert Rev Anticancer Ther* 2016;16:423-32.
- 347 4 Bergsbaken JJ, Eickhoff JC, Buss BA, *et al.* Assessment of adherence with oral  
348 anticancer agents in oncology clinical trials: A systematic review. *J Oncol Pharm Pract*  
349 2016;22:105-13.
- 350 5 Greer JA, Amoyal N, Nisotel L, *et al.* A Systematic Review of Adherence to Oral  
351 Antineoplastic Therapies. *Oncologist* 2016;21:354-76.
- 352 6 Fenerty SD, West C, Davis SA, *et al.* The effect of reminder systems on patients'  
353 adherence to treatment. *Patient Prefer Adherence* 2012;6:127-35.
- 354 7 Vervloet M, van Dijk L, Santen-Reestman J, *et al.* SMS reminders improve adherence  
355 to oral medication in type 2 diabetes patients who are real time electronically  
356 monitored. *Int J Med Inform* 2012;81:594-604.
- 357 8 Oakley C, Lennan E, Roe H, *et al.* Safe practice and nursing care of patients receiving  
358 oral anti-cancer medicines: a position statement from UKONS. *Ecancermedicalscience*  
359 2010;4:177.
- 360 9 Mathes T, Antoine SL, Pieper D, *et al.* Adherence enhancing interventions for oral  
361 anticancer agents: a systematic review. *Cancer Treat Rev* 2014;40:102-8.
- 362 10 Gebbia V, Bellavia M, Banna GL, *et al.* Treatment monitoring program for  
363 implementation of adherence to second-line erlotinib for advanced non-small-cell lung

- 1  
2  
3  
4 364 cancer. *Clin Lung Cancer* 2013;14:390-8.  
5  
6  
7 365 11 Simons S, Ringsdorf S, Braun M, *et al.* Enhancing adherence to capecitabine  
8  
9 366 chemotherapy by means of multidisciplinary pharmaceutical care. *Support Care Cancer*  
10  
11 367 2011;19:1009-18.  
12  
13 368 12 Weaver A, Young AM, Rowntree J, *et al.* Application of mobile phone technology for  
14  
15 369 managing chemotherapy-associated side-effects. *Ann Oncol* 2007;18:1887-92.  
16  
17  
18 370 13 Paré G, Moqadem K, Pineau G, *et al.* Clinical effects of home telemonitoring in the  
19  
20 371 context of diabetes, asthma, heart failure and hypertension: a systematic review. *J Med*  
21  
22 372 *Internet Res* 2010;12:e21.  
23  
24  
25 373 14 Polisen J, Tran K, Cimon K, *et al.* Home telehealth for chronic obstructive pulmonary  
26  
27 374 disease: a systematic review and meta-analysis. *J Telemed Telecare* 2010;16:120-7.  
28  
29  
30 375 15 Polisen J, Tran K, Cimon K, *et al.* Home telemonitoring for congestive heart failure: a  
31  
32 376 systematic review and meta-analysis. *J Telemed Telecare* 2010;16:68-76.  
33  
34 377 16 Galligioni E, Piras EM, Galvagni M, *et al.* Integrating mHealth in Oncology:  
35  
36 378 Experience in the Province of Trento. *J Med Internet Res* 2015;17:e114.  
37  
38  
39 379 17 Galligioni E, Berloff F, Caffo O, *et al.* Development and daily use of an electronic  
40  
41 380 oncological patient record for the total management of cancer patients: 7 years'  
42  
43 381 experience. *Ann Oncol* 2009;20:349-52.  
44  
45  
46 382 18 Eccher C, Gios L, Zanutto A, *et al.* TreC platform. An integrated and evolving care  
47  
48 383 model for patients' empowerment and data repository. *J Biomed Inform*  
49  
50 384 2020;102:103359.  
51  
52  
53 385 19 Eccher C, Piras EM, Stenico M. TreC - a REST-based regional PHR. *Stud Health*  
54  
55 386 *Technol Inform* 2011;169:108-12.  
56  
57  
58  
59  
60

- 1  
2  
3  
4 387 20 Passardi A, Rizzo M, Maines F, *et al.* Optimisation and validation of a remote  
5  
6 388 monitoring system (Onco-TreC) for home-based management of oral anticancer  
7  
8 389 therapies: an Italian multicentre feasibility study. *BMJ Open* 2017;7:e014617.  
9  
10  
11 390 21 Brooke, J. SUS: A “quick and dirty” usability scale. In: Jordan PW, Thomas B,  
12  
13 391 Weerdmeester BA, editors. Usability Evaluation in Industry. London: Taylor & Francis;  
14  
15 392 1996:189-94.  
16  
17  
18 393 22 Medeiros KS, Queiroz JF, Monteiro MN, *et al.* Impact of mobile applications on  
19  
20 394 adherence to cancer treatment: a systematic review and metaanalysis protocol *BMJ*  
21  
22 395 *Open* 2019;9:e027246.  
23  
24  
25  
26  
27  
28  
29  
30  
31  
32  
33  
34  
35  
36  
37  
38  
39  
40  
41  
42  
43  
44  
45  
46  
47  
48  
49  
50  
51  
52  
53  
54  
55  
56  
57  
58  
59  
60

er review only

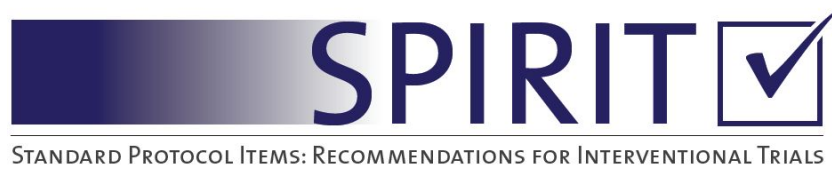

SPIRIT 2013 Checklist: Recommended items to address in a clinical trial protocol and related documents\*

| Section/item                      | ItemNo | Description                                                                                                  |                                              |
|-----------------------------------|--------|--------------------------------------------------------------------------------------------------------------|----------------------------------------------|
| <b>Administrative information</b> |        |                                                                                                              |                                              |
| Title                             | 1      | Descriptive title identifying the study design, population, interventions, and, if applicable, trial acronym | The Title is structured accordingly (page 1) |
| Trial registration                | 2a     | Trial identifier and registry name. If not yet registered, name of intended registry                         | ClinicalTrials.gov NCT04826458 (Page 4)      |
| Protocol version                  | 3      | Date and version identifier                                                                                  | Page 4                                       |
| Funding                           | 4      | Sources and types of financial, material, and other support                                                  | Page 17                                      |
| Roles and responsibilities        | 5a     | Names, affiliations, and roles of protocol contributors                                                      | Page 1                                       |
|                                   | 5b     | Name and contact information for the trial sponsor                                                           | NA, this is a non-industry-sponsored trial   |

1  
2  
3  
4  
5  
6  
7  
8  
9  
10  
11  
12  
13  
14  
15  
16  
17  
18  
19  
20  
21  
22  
23  
24  
25  
26  
27  
28  
29  
30  
31  
32  
33  
34  
35  
36  
37  
38  
39  
40  
41  
42  
43  
44  
45  
46  
47  
48  
49  
50  
51  
52  
53  
54  
55  
56  
57  
58  
59  
60

- 5c Role of study sponsor and funders, if any, in study design; collection, management, analysis, and interpretation of data; writing of the report; and the decision to submit the report for publication, including whether they will have ultimate authority over any of these activities **NA, this is a non-industry-sponsored trial**
- 5d Composition, roles, and responsibilities of the coordinating centre, steering committee, endpoint adjudication committee, data management team, and other individuals or groups overseeing the trial, if applicable (see Item 21a for data monitoring committee) **IRST is the coordinating centre of this study; the chief and co-chief investigators are Dr. Patrizia Serra (senior clinical research coordinator) and Dr. Alessandro Passardi (clinician). The coordinating centre has a core facility for the design and conduction of clinical trials, that is, the Biostatistics and Clinical Trials Unit. This unit is composed by study coordinators, monitors, and biostatisticians who support the principal investigators from the design of the study until its closure.**

## Introduction

- Background and rationale 6a Description of research question and justification for undertaking the trial, including summary of relevant studies (published and unpublished) examining benefits and harms for each intervention **Pages 6,7**
- 6b Explanation for choice of comparators **Pages 6,7**
- Objectives 7 Specific objectives or hypotheses **Page 7**

1  
2  
3  
4  
5  
6  
7  
8  
9  
10  
11  
12  
13  
14  
15

|              |   |                                                                                                                                                                                                           |                                                |
|--------------|---|-----------------------------------------------------------------------------------------------------------------------------------------------------------------------------------------------------------|------------------------------------------------|
| Trial design | 8 | Description of trial design including type of trial (eg, parallel group, crossover, factorial, single group), allocation ratio, and framework (eg, superiority, equivalence, noninferiority, exploratory) | Page 7 (in Methods and Analysis), lines 138-40 |
|--------------|---|-----------------------------------------------------------------------------------------------------------------------------------------------------------------------------------------------------------|------------------------------------------------|

16  
17  
18

**Methods: Participants, interventions, and outcomes**

19  
20  
21  
22  
23  
24  
25  
26  
27  
28  
29  
30

|               |   |                                                                                                                                                                                    |                                                |
|---------------|---|------------------------------------------------------------------------------------------------------------------------------------------------------------------------------------|------------------------------------------------|
| Study setting | 9 | Description of study settings (eg, community clinic, academic hospital) and list of countries where data will be collected. Reference to where list of study sites can be obtained | Page 9 (in Methods and Analysis) lines 153-155 |
|---------------|---|------------------------------------------------------------------------------------------------------------------------------------------------------------------------------------|------------------------------------------------|

31  
32  
33  
34  
35  
36  
37  
38  
39  
40  
41  
42  
43  
44  
45

|                      |    |                                                                                                                                                                                              |                       |
|----------------------|----|----------------------------------------------------------------------------------------------------------------------------------------------------------------------------------------------|-----------------------|
| Eligibility criteria | 10 | Inclusion and exclusion criteria for participants. If applicable, eligibility criteria for study centres and individuals who will perform the interventions (eg, surgeons, psychotherapists) | Page 8, lines 143-150 |
|----------------------|----|----------------------------------------------------------------------------------------------------------------------------------------------------------------------------------------------|-----------------------|

46  
47  
48  
49  
50  
51  
52  
53  
54  
55  
56  
57  
58  
59  
60

|               |     |                                                                                                                            |         |
|---------------|-----|----------------------------------------------------------------------------------------------------------------------------|---------|
| Interventions | 11a | Interventions for each group with sufficient detail to allow replication, including how and when they will be administered | Page 10 |
|---------------|-----|----------------------------------------------------------------------------------------------------------------------------|---------|

|    |          |     |                         |
|----|----------|-----|-------------------------|
| 1  |          |     |                         |
| 2  |          | 11b | Criteria for            |
| 3  |          |     | discontinuing or        |
| 4  |          |     | modifying allocated     |
| 5  |          |     | interventions for a     |
| 6  |          |     | given trial participant |
| 7  |          |     | (eg, drug dose          |
| 8  |          |     | change in response to   |
| 9  |          |     | harms, participant      |
| 10 |          |     | request, or             |
| 11 |          |     | improving/worsening     |
| 12 |          |     | disease)                |
| 13 |          |     |                         |
| 14 |          |     |                         |
| 15 |          |     |                         |
| 16 |          | 11c | Strategies to improve   |
| 17 |          |     | adherence to            |
| 18 |          |     | intervention protocols, |
| 19 |          |     | and any procedures      |
| 20 |          |     | for monitoring          |
| 21 |          |     | adherence (eg, drug     |
| 22 |          |     | tablet return,          |
| 23 |          |     | laboratory tests)       |
| 24 |          |     |                         |
| 25 |          |     |                         |
| 26 |          |     |                         |
| 27 |          | 11d | Relevant concomitant    |
| 28 |          |     | care and interventions  |
| 29 |          |     | that are permitted or   |
| 30 |          |     | prohibited during the   |
| 31 |          |     | trial                   |
| 32 |          |     |                         |
| 33 |          |     |                         |
| 34 | Outcomes | 12  | Primary, secondary,     |
| 35 |          |     | and other outcomes,     |
| 36 |          |     | including the specific  |
| 37 |          |     | measurement variable    |
| 38 |          |     | (eg, systolic blood     |
| 39 |          |     | pressure), analysis     |
| 40 |          |     | metric (eg, change      |
| 41 |          |     | from baseline, final    |
| 42 |          |     | value, time to event),  |
| 43 |          |     | method of               |
| 44 |          |     | aggregation (eg,        |
| 45 |          |     | median, proportion),    |
| 46 |          |     | and time point for      |
| 47 |          |     | each outcome.           |
| 48 |          |     | Explanation of the      |
| 49 |          |     | clinical relevance of   |
| 50 |          |     | chosen efficacy and     |
| 51 |          |     | harm outcomes is        |
| 52 |          |     | strongly                |
| 53 |          |     | recommended             |
| 54 |          |     |                         |
| 55 |          |     |                         |
| 56 |          |     |                         |
| 57 |          |     |                         |
| 58 |          |     |                         |
| 59 |          |     |                         |
| 60 |          |     |                         |

Page 10, the observation period will end earlier than planned for disease progression, unacceptable toxicity or patient refusal (lines 222-225)

Pages 10,11. Patients will be closely monitored and trained by the clinician or the counsellor at the beginning of the study as well as, if necessary, at the following clinical visits.

Page 8

Pages 11-13

|                                                                                  |                         |    |                                                                                                                                                                                                                     |                                                                                                                                                                                                                                                                                                              |
|----------------------------------------------------------------------------------|-------------------------|----|---------------------------------------------------------------------------------------------------------------------------------------------------------------------------------------------------------------------|--------------------------------------------------------------------------------------------------------------------------------------------------------------------------------------------------------------------------------------------------------------------------------------------------------------|
| 1<br>2<br>3<br>4<br>5<br>6<br>7<br>8<br>9<br>10<br>11<br>12<br>13<br>14<br>15    | Participant<br>timeline | 13 | Time schedule of<br>enrolment,<br>interventions<br>(including any run-ins<br>and washouts),<br>assessments, and<br>visits for participants.<br>A schematic diagram<br>is highly<br>recommended (see<br>Figure)      | Pages 10-11. Other than a description of<br>enrolment and study duration as well as<br>of intervention and timing of the study<br>visits, already reported in the paper, the<br>original protocol contains a flow-chart<br>table of the study.                                                               |
| 16<br>17<br>18<br>19<br>20<br>21<br>22<br>23<br>24<br>25<br>26<br>27<br>28<br>29 | Sample size             | 14 | Estimated number of<br>participants needed to<br>achieve study<br>objectives and how it<br>was determined,<br>including clinical and<br>statistical<br>assumptions<br>supporting any<br>sample size<br>calculations | Page 14                                                                                                                                                                                                                                                                                                      |
| 30<br>31<br>32<br>33<br>34<br>35<br>36<br>37<br>38<br>39                         | Recruitment             | 15 | Strategies for<br>achieving adequate<br>participant enrolment<br>to reach target<br>sample size                                                                                                                     | The eligibility criteria are wide favouring<br>enrolment (target number and timing) of<br>the target population and the pragmatic<br>nature of the study itself. As for every<br>new study activated by the coordinating<br>centre, a feasibility check has been<br>carried out during the protocol writing. |

#### Methods: Assignment of interventions (for controlled trials)

Allocation:



|    |                |     |                         |        |
|----|----------------|-----|-------------------------|--------|
| 1  |                |     |                         |        |
| 2  | Sequence       | 16a | Method of generating    | Page 9 |
| 3  | generation     |     | the allocation          |        |
| 4  |                |     | sequence (eg,           |        |
| 5  |                |     | computer-generated      |        |
| 6  |                |     | random numbers),        |        |
| 7  |                |     | and list of any factors |        |
| 8  |                |     | for stratification. To  |        |
| 9  |                |     | reduce predictability   |        |
| 10 |                |     | of a random             |        |
| 11 |                |     | sequence, details of    |        |
| 12 |                |     | any planned             |        |
| 13 |                |     | restriction (eg,        |        |
| 14 |                |     | blocking) should be     |        |
| 15 |                |     | provided in a           |        |
| 16 |                |     | separate document       |        |
| 17 |                |     | that is unavailable to  |        |
| 18 |                |     | those who enrol         |        |
| 19 |                |     | participants or assign  |        |
| 20 |                |     | interventions           |        |
| 21 |                |     |                         |        |
| 22 |                |     |                         |        |
| 23 |                |     |                         |        |
| 24 |                |     |                         |        |
| 25 |                |     |                         |        |
| 26 | Allocation     | 16b | Mechanism of            | Page 9 |
| 27 | concealment    |     | implementing the        |        |
| 28 | mechanism      |     | allocation sequence     |        |
| 29 |                |     | (eg, central            |        |
| 30 |                |     | telephone;              |        |
| 31 |                |     | sequentially            |        |
| 32 |                |     | numbered, opaque,       |        |
| 33 |                |     | sealed envelopes),      |        |
| 34 |                |     | describing any steps    |        |
| 35 |                |     | to conceal the          |        |
| 36 |                |     | sequence until          |        |
| 37 |                |     | interventions are       |        |
| 38 |                |     | assigned                |        |
| 39 |                |     |                         |        |
| 40 |                |     |                         |        |
| 41 |                |     |                         |        |
| 42 |                |     |                         |        |
| 43 | Implementation | 16c | Who will generate the   | Page 9 |
| 44 |                |     | allocation sequence,    |        |
| 45 |                |     | who will enrol          |        |
| 46 |                |     | participants, and who   |        |
| 47 |                |     | will assign             |        |
| 48 |                |     | participants to         |        |
| 49 |                |     | interventions           |        |
| 50 |                |     |                         |        |
| 51 |                |     |                         |        |
| 52 |                |     |                         |        |
| 53 |                |     |                         |        |
| 54 |                |     |                         |        |
| 55 |                |     |                         |        |
| 56 |                |     |                         |        |
| 57 |                |     |                         |        |
| 58 |                |     |                         |        |
| 59 |                |     |                         |        |
| 60 |                |     |                         |        |

|    |           |     |                          |                                     |
|----|-----------|-----|--------------------------|-------------------------------------|
| 1  |           |     |                          |                                     |
| 2  | Blinding  | 17a | Who will be blinded      | Page 8, this is an open label trial |
| 3  | (masking) |     | after assignment to      |                                     |
| 4  |           |     | interventions (eg, trial |                                     |
| 5  |           |     | participants, care       |                                     |
| 6  |           |     | providers, outcome       |                                     |
| 7  |           |     | assessors, data          |                                     |
| 8  |           |     | analysts), and how       |                                     |
| 9  |           |     |                          |                                     |
| 10 |           |     |                          |                                     |
| 11 |           | 17b | If blinded,              | NA                                  |
| 12 |           |     | circumstances under      |                                     |
| 13 |           |     | which unblinding is      |                                     |
| 14 |           |     | permissible, and         |                                     |
| 15 |           |     | procedure for            |                                     |
| 16 |           |     | revealing a              |                                     |
| 17 |           |     | participant's allocated  |                                     |
| 18 |           |     | intervention during      |                                     |
| 19 |           |     | the trial                |                                     |
| 20 |           |     |                          |                                     |
| 21 |           |     |                          |                                     |
| 22 |           |     |                          |                                     |

**Methods: Data collection, management, and analysis**

|    |                 |     |                         |                                |
|----|-----------------|-----|-------------------------|--------------------------------|
| 23 |                 |     |                         |                                |
| 24 |                 |     |                         |                                |
| 25 |                 |     |                         |                                |
| 26 | Data collection | 18a | Plans for assessment    | Study procedures (Page 11) and |
| 27 | methods         |     | and collection of       | data management (Pages 13-14). |
| 28 |                 |     | outcome, baseline,      |                                |
| 29 |                 |     | and other trial data,   |                                |
| 30 |                 |     | including any related   |                                |
| 31 |                 |     | processes to promote    |                                |
| 32 |                 |     | data quality (eg,       |                                |
| 33 |                 |     | duplicate               |                                |
| 34 |                 |     | measurements,           |                                |
| 35 |                 |     | training of assessors)  |                                |
| 36 |                 |     | and a description of    |                                |
| 37 |                 |     | study instruments (eg,  |                                |
| 38 |                 |     | questionnaires,         |                                |
| 39 |                 |     | laboratory tests) along |                                |
| 40 |                 |     | with their reliability  |                                |
| 41 |                 |     | and validity, if known. |                                |
| 42 |                 |     | Reference to where      |                                |
| 43 |                 |     | data collection forms   |                                |
| 44 |                 |     | can be found, if not in |                                |
| 45 |                 |     | the protocol            |                                |
| 46 |                 |     |                         |                                |
| 47 |                 |     |                         |                                |
| 48 |                 |     |                         |                                |
| 49 |                 |     |                         |                                |
| 50 |                 |     |                         |                                |
| 51 |                 |     |                         |                                |
| 52 |                 |     |                         |                                |
| 53 |                 |     |                         |                                |
| 54 |                 |     |                         |                                |
| 55 |                 |     |                         |                                |
| 56 |                 |     |                         |                                |
| 57 |                 |     |                         |                                |
| 58 |                 |     |                         |                                |
| 59 |                 |     |                         |                                |
| 60 |                 |     |                         |                                |

|    |             |     |                         |
|----|-------------|-----|-------------------------|
| 1  |             |     |                         |
| 2  |             | 18b | Plans to promote        |
| 3  |             |     | participant retention   |
| 4  |             |     | and complete follow-    |
| 5  |             |     | up, including list of   |
| 6  |             |     | any outcome data to     |
| 7  |             |     | be collected for        |
| 8  |             |     | participants who        |
| 9  |             |     | discontinue or deviate  |
| 10 |             |     | from intervention       |
| 11 |             |     | protocols               |
| 12 |             |     |                         |
| 13 |             |     |                         |
| 14 |             |     |                         |
| 15 | Data        | 19  | Plans for data entry,   |
| 16 | management  |     | coding, security, and   |
| 17 |             |     | storage, including any  |
| 18 |             |     | related processes to    |
| 19 |             |     | promote data quality    |
| 20 |             |     | (eg, double data        |
| 21 |             |     | entry; range checks     |
| 22 |             |     | for data values).       |
| 23 |             |     | Reference to where      |
| 24 |             |     | details of data         |
| 25 |             |     | management              |
| 26 |             |     | procedures can be       |
| 27 |             |     | found, if not in the    |
| 28 |             |     | protocol                |
| 29 |             |     |                         |
| 30 |             |     |                         |
| 31 |             |     |                         |
| 32 |             |     |                         |
| 33 | Statistical | 20a | Statistical methods for |
| 34 | methods     |     | analysing primary and   |
| 35 |             |     | secondary outcomes.     |
| 36 |             |     | Reference to where      |
| 37 |             |     | other details of the    |
| 38 |             |     | statistical analysis    |
| 39 |             |     | plan can be found, if   |
| 40 |             |     | not in the protocol     |
| 41 |             |     |                         |
| 42 |             |     |                         |
| 43 |             |     |                         |
| 44 |             | 20b | Methods for any         |
| 45 |             |     | additional analyses     |
| 46 |             |     | (eg, subgroup and       |
| 47 |             |     | adjusted analyses)      |
| 48 |             |     |                         |
| 49 |             |     |                         |
| 50 |             | 20c | Definition of analysis  |
| 51 |             |     | population relating to  |
| 52 |             |     | protocol non-           |
| 53 |             |     | adherence (eg, as       |
| 54 |             |     | randomised analysis),   |
| 55 |             |     | and any statistical     |
| 56 |             |     | methods to handle       |
| 57 |             |     | missing data (eg,       |
| 58 |             |     | multiple imputation)    |
| 59 |             |     |                         |
| 60 |             |     |                         |

This aspect was taken into account during the trial design, especially with respect to the definition of duration of follow-up. That is, defining an intervention window not too short and not too long. Reasons for early termination are collected in the eCRFs.

Page 13 (Data management)

Page 14

NA

Page 14

1  
2 **Methods: Monitoring**

|    |                 |     |                          |
|----|-----------------|-----|--------------------------|
| 3  |                 |     |                          |
| 4  | Data monitoring | 21a | Composition of data      |
| 5  |                 |     | monitoring committee     |
| 6  |                 |     | (DMC); summary of        |
| 7  |                 |     | its role and reporting   |
| 8  |                 |     | structure; statement     |
| 9  |                 |     | of whether it is         |
| 10 |                 |     | independent from the     |
| 11 |                 |     | sponsor and              |
| 12 |                 |     | competing interests;     |
| 13 |                 |     | and reference to         |
| 14 |                 |     | where further details    |
| 15 |                 |     | about its charter can    |
| 16 |                 |     | be found, if not in the  |
| 17 |                 |     | protocol. Alternatively, |
| 18 |                 |     | an explanation of why    |
| 19 |                 |     | a DMC is not needed      |
| 20 |                 |     |                          |
| 21 |                 |     |                          |
| 22 |                 |     |                          |
| 23 |                 |     |                          |
| 24 |                 | 21b | Description of any       |
| 25 |                 |     | interim analyses and     |
| 26 |                 |     | stopping guidelines,     |
| 27 |                 |     | including who will       |
| 28 |                 |     | have access to these     |
| 29 |                 |     | interim results and      |
| 30 |                 |     | make the final           |
| 31 |                 |     | decision to terminate    |
| 32 |                 |     | the trial                |
| 33 |                 |     |                          |
| 34 |                 |     |                          |
| 35 |                 |     |                          |
| 36 | Harms           | 22  | Plans for collecting,    |
| 37 |                 |     | assessing, reporting,    |
| 38 |                 |     | and managing             |
| 39 |                 |     | solicited and            |
| 40 |                 |     | spontaneously            |
| 41 |                 |     | reported adverse         |
| 42 |                 |     | events and other         |
| 43 |                 |     | unintended effects of    |
| 44 |                 |     | trial interventions or   |
| 45 |                 |     | trial conduct            |
| 46 |                 |     |                          |
| 47 |                 |     |                          |
| 48 |                 |     |                          |
| 49 | Auditing        | 23  | Frequency and            |
| 50 |                 |     | procedures for           |
| 51 |                 |     | auditing trial conduct,  |
| 52 |                 |     | if any, and whether      |
| 53 |                 |     | the process will be      |
| 54 |                 |     | independent from         |
| 55 |                 |     | investigators and the    |
| 56 |                 |     | sponsor                  |
| 57 |                 |     |                          |
| 58 |                 |     |                          |
| 59 |                 |     |                          |
| 60 |                 |     |                          |

Given the nature of the study, eg. not testing a new drug, not having serious safety concerns or unknown risks (the intervention under study here is an electronic diary), not having any regulatory approval intent, the DMC was not included.

NA, no interim analyses were planned

NA

NA

## Ethics and dissemination

|    |                          |     |                                                                                                                                                                                                                                  |
|----|--------------------------|-----|----------------------------------------------------------------------------------------------------------------------------------------------------------------------------------------------------------------------------------|
| 1  |                          |     |                                                                                                                                                                                                                                  |
| 2  |                          |     |                                                                                                                                                                                                                                  |
| 3  |                          |     |                                                                                                                                                                                                                                  |
| 4  | Research ethics approval | 24  | Plans for seeking research ethics committee/institutional review board (REC/IRB) approval                                                                                                                                        |
| 5  |                          |     |                                                                                                                                                                                                                                  |
| 6  |                          |     |                                                                                                                                                                                                                                  |
| 7  |                          |     |                                                                                                                                                                                                                                  |
| 8  |                          |     |                                                                                                                                                                                                                                  |
| 9  |                          |     |                                                                                                                                                                                                                                  |
| 10 |                          |     |                                                                                                                                                                                                                                  |
| 11 | Protocol amendments      | 25  | Plans for communicating important protocol modifications (eg, changes to eligibility criteria, outcomes, analyses) to relevant parties (eg, investigators, REC/IRBs, trial participants, trial registries, journals, regulators) |
| 12 |                          |     |                                                                                                                                                                                                                                  |
| 13 |                          |     |                                                                                                                                                                                                                                  |
| 14 |                          |     |                                                                                                                                                                                                                                  |
| 15 |                          |     |                                                                                                                                                                                                                                  |
| 16 |                          |     |                                                                                                                                                                                                                                  |
| 17 |                          |     |                                                                                                                                                                                                                                  |
| 18 |                          |     |                                                                                                                                                                                                                                  |
| 19 |                          |     |                                                                                                                                                                                                                                  |
| 20 |                          |     |                                                                                                                                                                                                                                  |
| 21 |                          |     |                                                                                                                                                                                                                                  |
| 22 |                          |     |                                                                                                                                                                                                                                  |
| 23 |                          |     |                                                                                                                                                                                                                                  |
| 24 |                          |     |                                                                                                                                                                                                                                  |
| 25 |                          |     |                                                                                                                                                                                                                                  |
| 26 |                          |     |                                                                                                                                                                                                                                  |
| 27 |                          |     |                                                                                                                                                                                                                                  |
| 28 | Consent or assent        | 26a | Who will obtain informed consent or assent from potential trial participants or authorised surrogates, and how (see Item 32)                                                                                                     |
| 29 |                          |     |                                                                                                                                                                                                                                  |
| 30 |                          |     |                                                                                                                                                                                                                                  |
| 31 |                          |     |                                                                                                                                                                                                                                  |
| 32 |                          |     |                                                                                                                                                                                                                                  |
| 33 |                          |     |                                                                                                                                                                                                                                  |
| 34 |                          |     |                                                                                                                                                                                                                                  |
| 35 |                          |     |                                                                                                                                                                                                                                  |
| 36 |                          |     |                                                                                                                                                                                                                                  |
| 37 |                          |     |                                                                                                                                                                                                                                  |
| 38 |                          | 26b | Additional consent provisions for collection and use of participant data and biological specimens in ancillary studies, if applicable                                                                                            |
| 39 |                          |     |                                                                                                                                                                                                                                  |
| 40 |                          |     |                                                                                                                                                                                                                                  |
| 41 |                          |     |                                                                                                                                                                                                                                  |
| 42 |                          |     |                                                                                                                                                                                                                                  |
| 43 |                          |     |                                                                                                                                                                                                                                  |
| 44 |                          |     |                                                                                                                                                                                                                                  |
| 45 |                          |     |                                                                                                                                                                                                                                  |
| 46 |                          |     |                                                                                                                                                                                                                                  |
| 47 | Confidentiality          | 27  | How personal information about potential and enrolled participants will be collected, shared, and maintained in order to protect confidentiality before, during, and after the trial                                             |
| 48 |                          |     |                                                                                                                                                                                                                                  |
| 49 |                          |     |                                                                                                                                                                                                                                  |
| 50 |                          |     |                                                                                                                                                                                                                                  |
| 51 |                          |     |                                                                                                                                                                                                                                  |
| 52 |                          |     |                                                                                                                                                                                                                                  |
| 53 |                          |     |                                                                                                                                                                                                                                  |
| 54 |                          |     |                                                                                                                                                                                                                                  |
| 55 |                          |     |                                                                                                                                                                                                                                  |
| 56 |                          |     |                                                                                                                                                                                                                                  |
| 57 |                          |     |                                                                                                                                                                                                                                  |
| 58 |                          |     |                                                                                                                                                                                                                                  |
| 59 |                          |     |                                                                                                                                                                                                                                  |
| 60 |                          |     |                                                                                                                                                                                                                                  |

|    |                 |     |                          |                                         |
|----|-----------------|-----|--------------------------|-----------------------------------------|
| 1  |                 |     |                          |                                         |
| 2  | Declaration of  | 28  | Financial and other      | Page 17                                 |
| 3  | interests       |     | competing interests      |                                         |
| 4  |                 |     | for principal            |                                         |
| 5  |                 |     | investigators for the    |                                         |
| 6  |                 |     | overall trial and each   |                                         |
| 7  |                 |     | study site               |                                         |
| 8  |                 |     |                          |                                         |
| 9  |                 |     |                          |                                         |
| 10 | Access to data  | 29  | Statement of who will    | Page 15                                 |
| 11 |                 |     | have access to the       |                                         |
| 12 |                 |     | final trial dataset, and |                                         |
| 13 |                 |     | disclosure of            |                                         |
| 14 |                 |     | contractual              |                                         |
| 15 |                 |     | agreements that limit    |                                         |
| 16 |                 |     | such access for          |                                         |
| 17 |                 |     | investigators            |                                         |
| 18 |                 |     |                          |                                         |
| 19 |                 |     |                          |                                         |
| 20 |                 |     |                          |                                         |
| 21 | Ancillary and   | 30  | Provisions, if any, for  | NA                                      |
| 22 | post-trial care |     | ancillary and post-trial |                                         |
| 23 |                 |     | care, and for            |                                         |
| 24 |                 |     | compensation to          |                                         |
| 25 |                 |     | those who suffer harm    |                                         |
| 26 |                 |     | from trial participation |                                         |
| 27 |                 |     |                          |                                         |
| 28 |                 |     |                          |                                         |
| 29 | Dissemination   | 31a | Plans for investigators  | Page 15                                 |
| 30 | policy          |     | and sponsor to           |                                         |
| 31 |                 |     | communicate trial        |                                         |
| 32 |                 |     | results to participants, |                                         |
| 33 |                 |     | healthcare               |                                         |
| 34 |                 |     | professionals, the       |                                         |
| 35 |                 |     | public, and other        |                                         |
| 36 |                 |     | relevant groups (eg,     |                                         |
| 37 |                 |     | via publication,         |                                         |
| 38 |                 |     | reporting in results     |                                         |
| 39 |                 |     | databases, or other      |                                         |
| 40 |                 |     | data sharing             |                                         |
| 41 |                 |     | arrangements),           |                                         |
| 42 |                 |     | including any            |                                         |
| 43 |                 |     | publication restrictions |                                         |
| 44 |                 |     |                          |                                         |
| 45 |                 |     |                          |                                         |
| 46 |                 |     |                          |                                         |
| 47 |                 |     |                          |                                         |
| 48 |                 | 31b | Authorship eligibility   | Authorship will be proportional to the  |
| 49 |                 |     | guidelines and any       | accrual of each center. No professional |
| 50 |                 |     | intended use of          | writer will be used.                    |
| 51 |                 |     | professional writers     |                                         |
| 52 |                 |     |                          |                                         |
| 53 |                 |     |                          |                                         |
| 54 |                 |     |                          |                                         |
| 55 |                 |     |                          |                                         |
| 56 |                 |     |                          |                                         |
| 57 |                 |     |                          |                                         |
| 58 |                 |     |                          |                                         |
| 59 |                 |     |                          |                                         |
| 60 |                 |     |                          |                                         |

1  
2 31c Plans, if any, for [See IPD statement on clinicaltrials.gov](https://clinicaltrials.gov)  
3 granting public access  
4 to the full protocol,  
5 participant-level  
6 dataset, and statistical  
7 code  
8  
9

## 10 Appendices

11  
12 Informed consent 32 Model consent form [This information can be found](#)  
13 materials and other related [in the study protocol but not in the](#)  
14 documentation given [manuscript.](#)  
15 to participants and  
16 authorised surrogates  
17  
18  
19 Biological 33 Plans for collection, [NA](#)  
20 specimens laboratory evaluation,  
21 and storage of  
22 biological specimens  
23 for genetic or  
24 molecular analysis in  
25 the current trial and  
26 for future use in  
27 ancillary studies, if  
28 applicable  
29  
30  
31  
32  
33  
34  
35  
36  
37  
38  
39  
40  
41  
42  
43  
44  
45  
46  
47  
48  
49  
50  
51  
52  
53  
54  
55  
56  
57  
58  
59  
60

---
